# Supplementary material for: Development and Validation for Quantification of 7-Nitroso Impurity in Sitagliptin by Ultraperformance Liquid Chromatography with Triple Quadrupole Mass Spectrometry
Source: MDPI journal article supplement (doi:10.3390/molecules27238581), 2022-12-05
Supplement: s1 [file s1]

# **Development and Validation for Quantification of 7-Nitroso Impurity in Sitagliptin by Ultraperformance Liquid Chromatography with Triple Quadrupole Mass Spectrometry**

**Hari Naga Prasada Reddy Chittireddy <sup>1</sup>, J. V. Shanmukha Kumar <sup>1,\*</sup>, Anuradha Bhimireddy <sup>2</sup>,  
Mohammed Rafi Shaik <sup>3,\*</sup>, Merajuddin Khan <sup>3</sup>, Syed Farooq Adil <sup>3</sup>, Mujeeb Khan <sup>3</sup> and Fatimah N. Aldhuwayhi <sup>3</sup>**

<sup>1</sup> Department of Engineering Chemistry, College of Engineering, Koneru Lakshmaiah Education Foundation, Vaddeswaram, Guntur 522502, Andhra Pradesh, India

<sup>2</sup> Aurobindo Pharma Limited, Sanga Reddy, Indrakaran 502329, Telangana, India

<sup>3</sup> Department of Chemistry, College of Science, King Saud University, P.O. Box 2455, Riyadh 11451, Saudi Arabia

\* Correspondence: shanmukh\_fed@kluniversity.in (J.V.S.K.); mrshaik@ksu.edu.sa (M.R.S.);  
Tel.: +966-11-4670439 (M.R.S.)

## **Validation parameters:**

### **1. System suitability and Specificity chromatograms:**

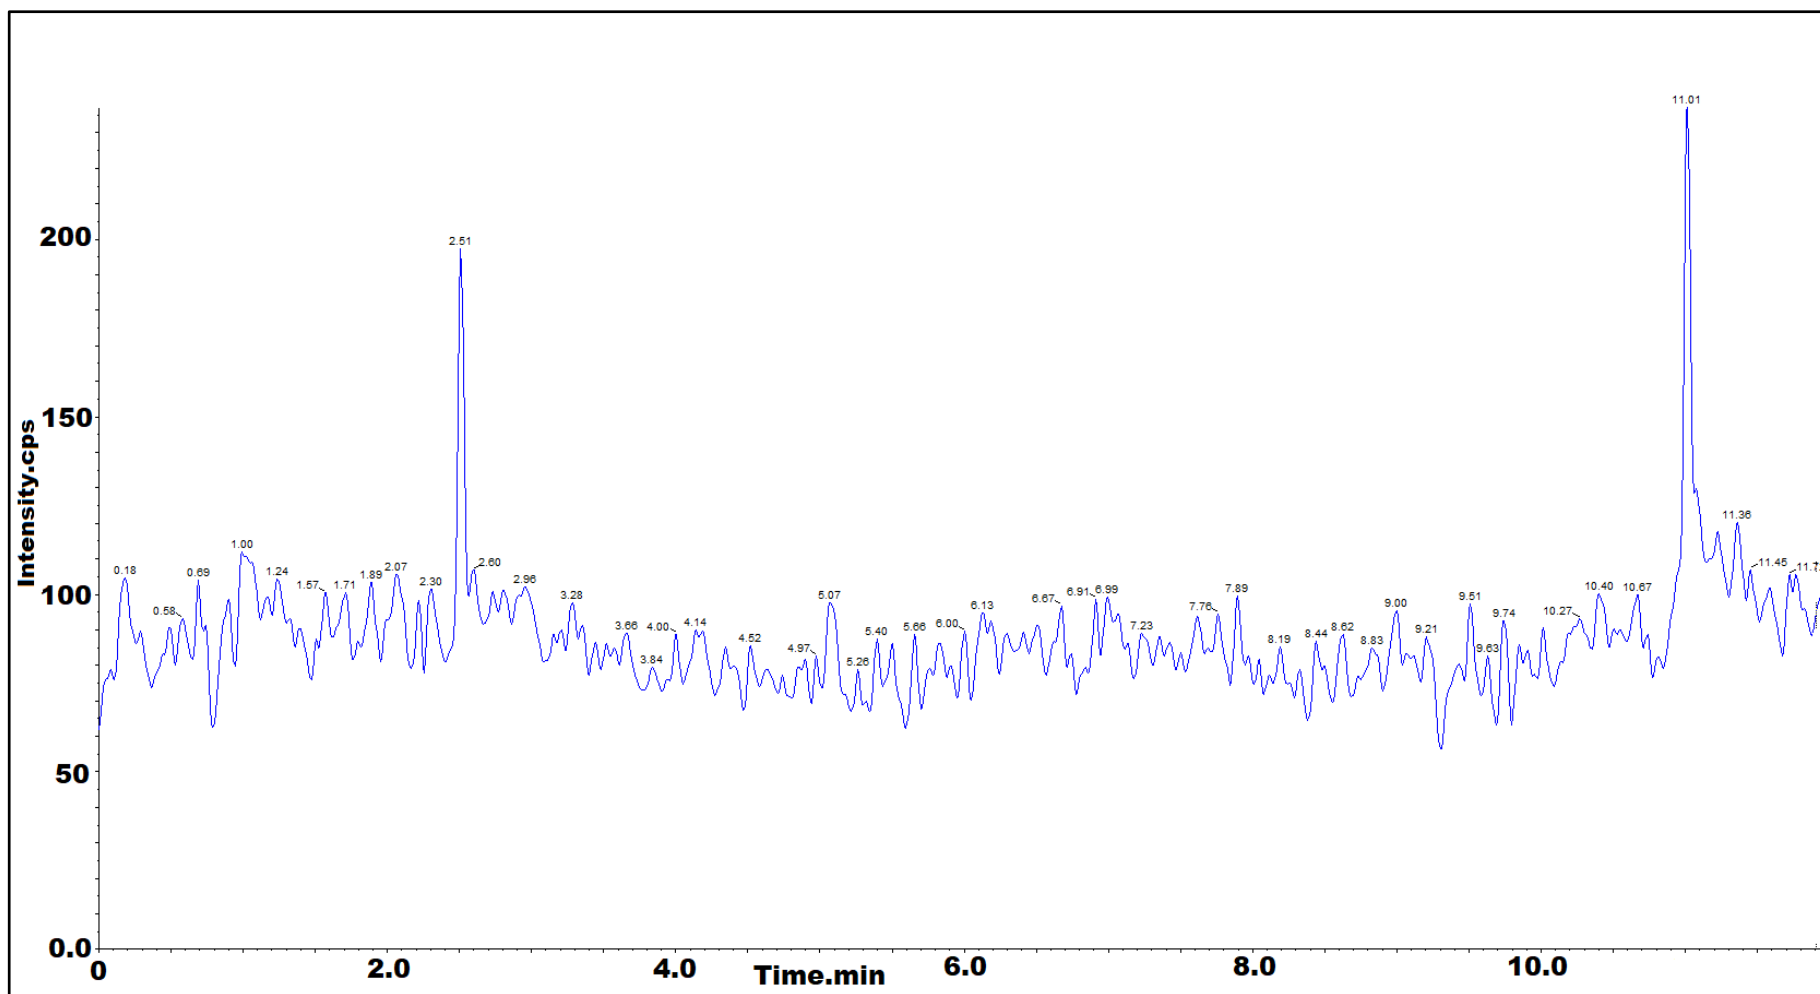

Figure S1: MS/MS chromatogram of Blank solution.

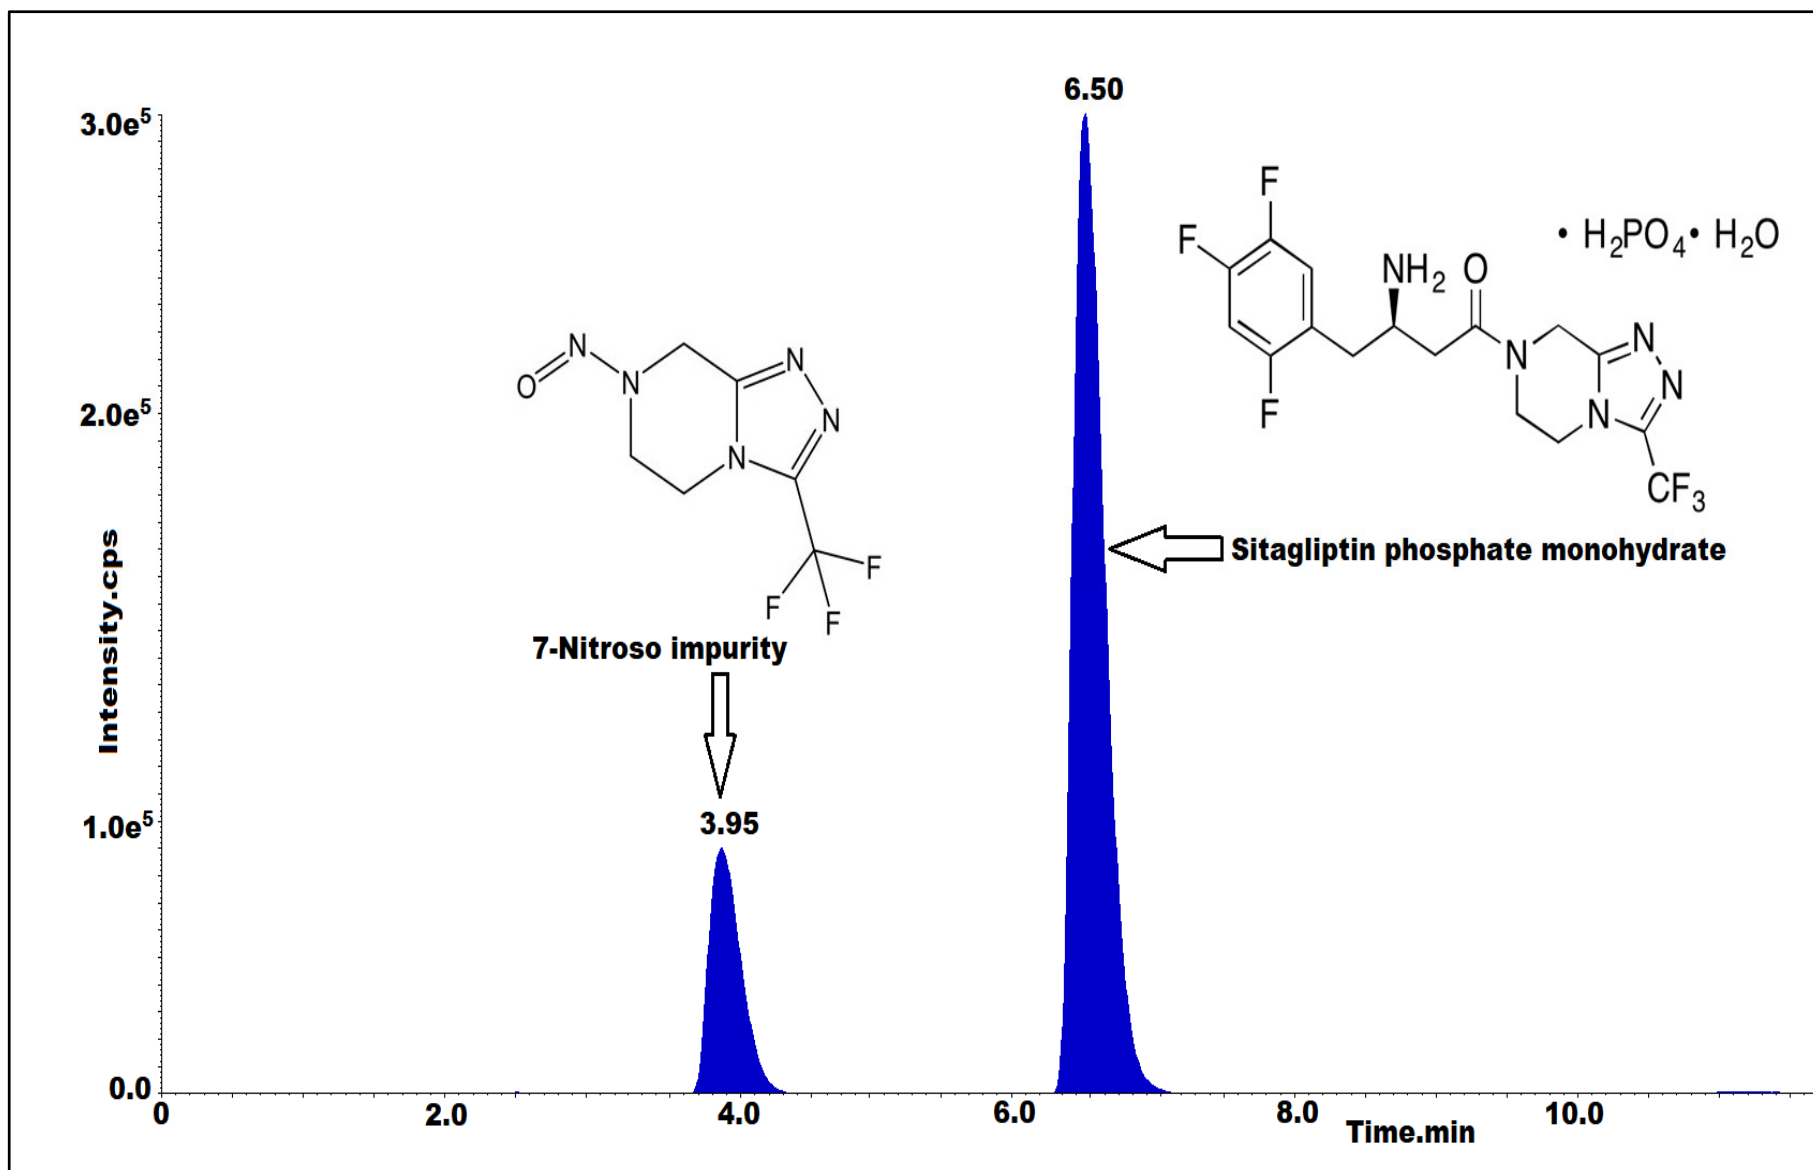

Figure S2: MS/MS chromatogram of 7-nitroso impurity spiked sample.

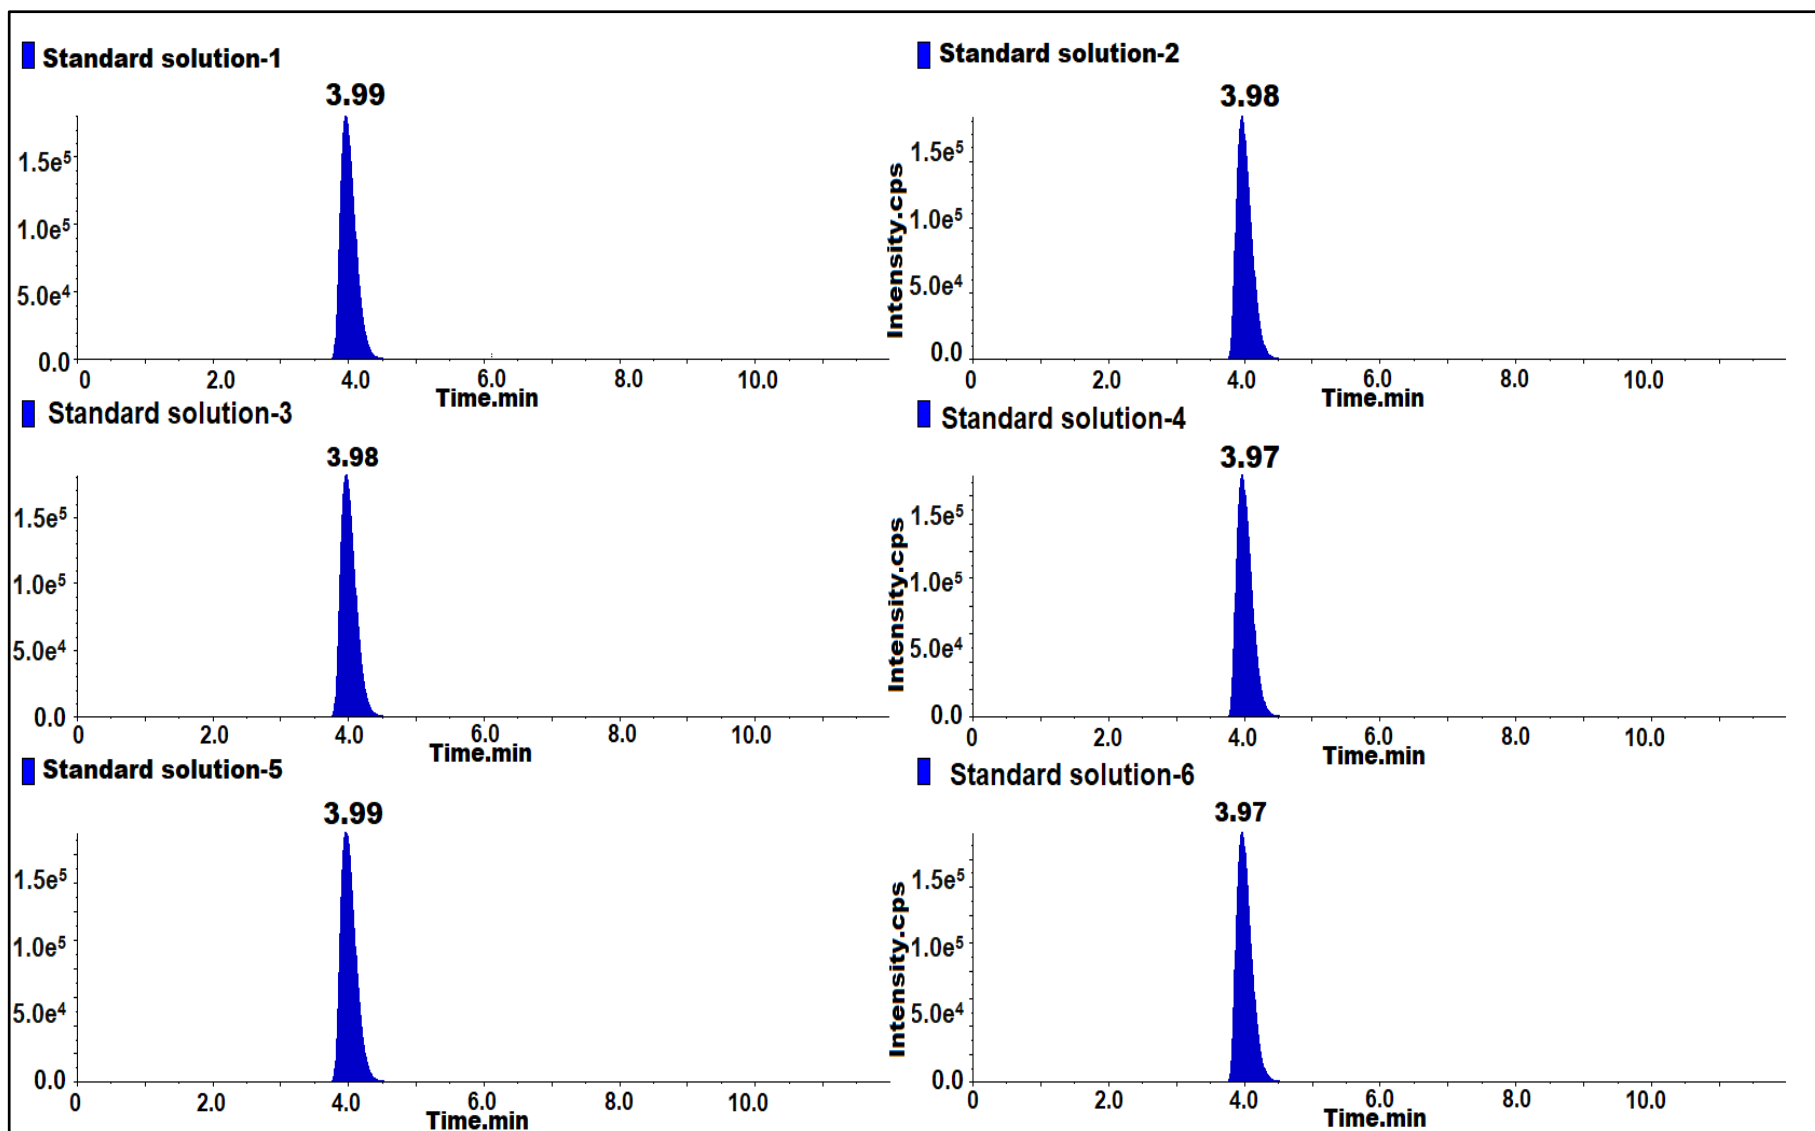

Figure S3: MS/MS chromatogram of System suitability standard solution.

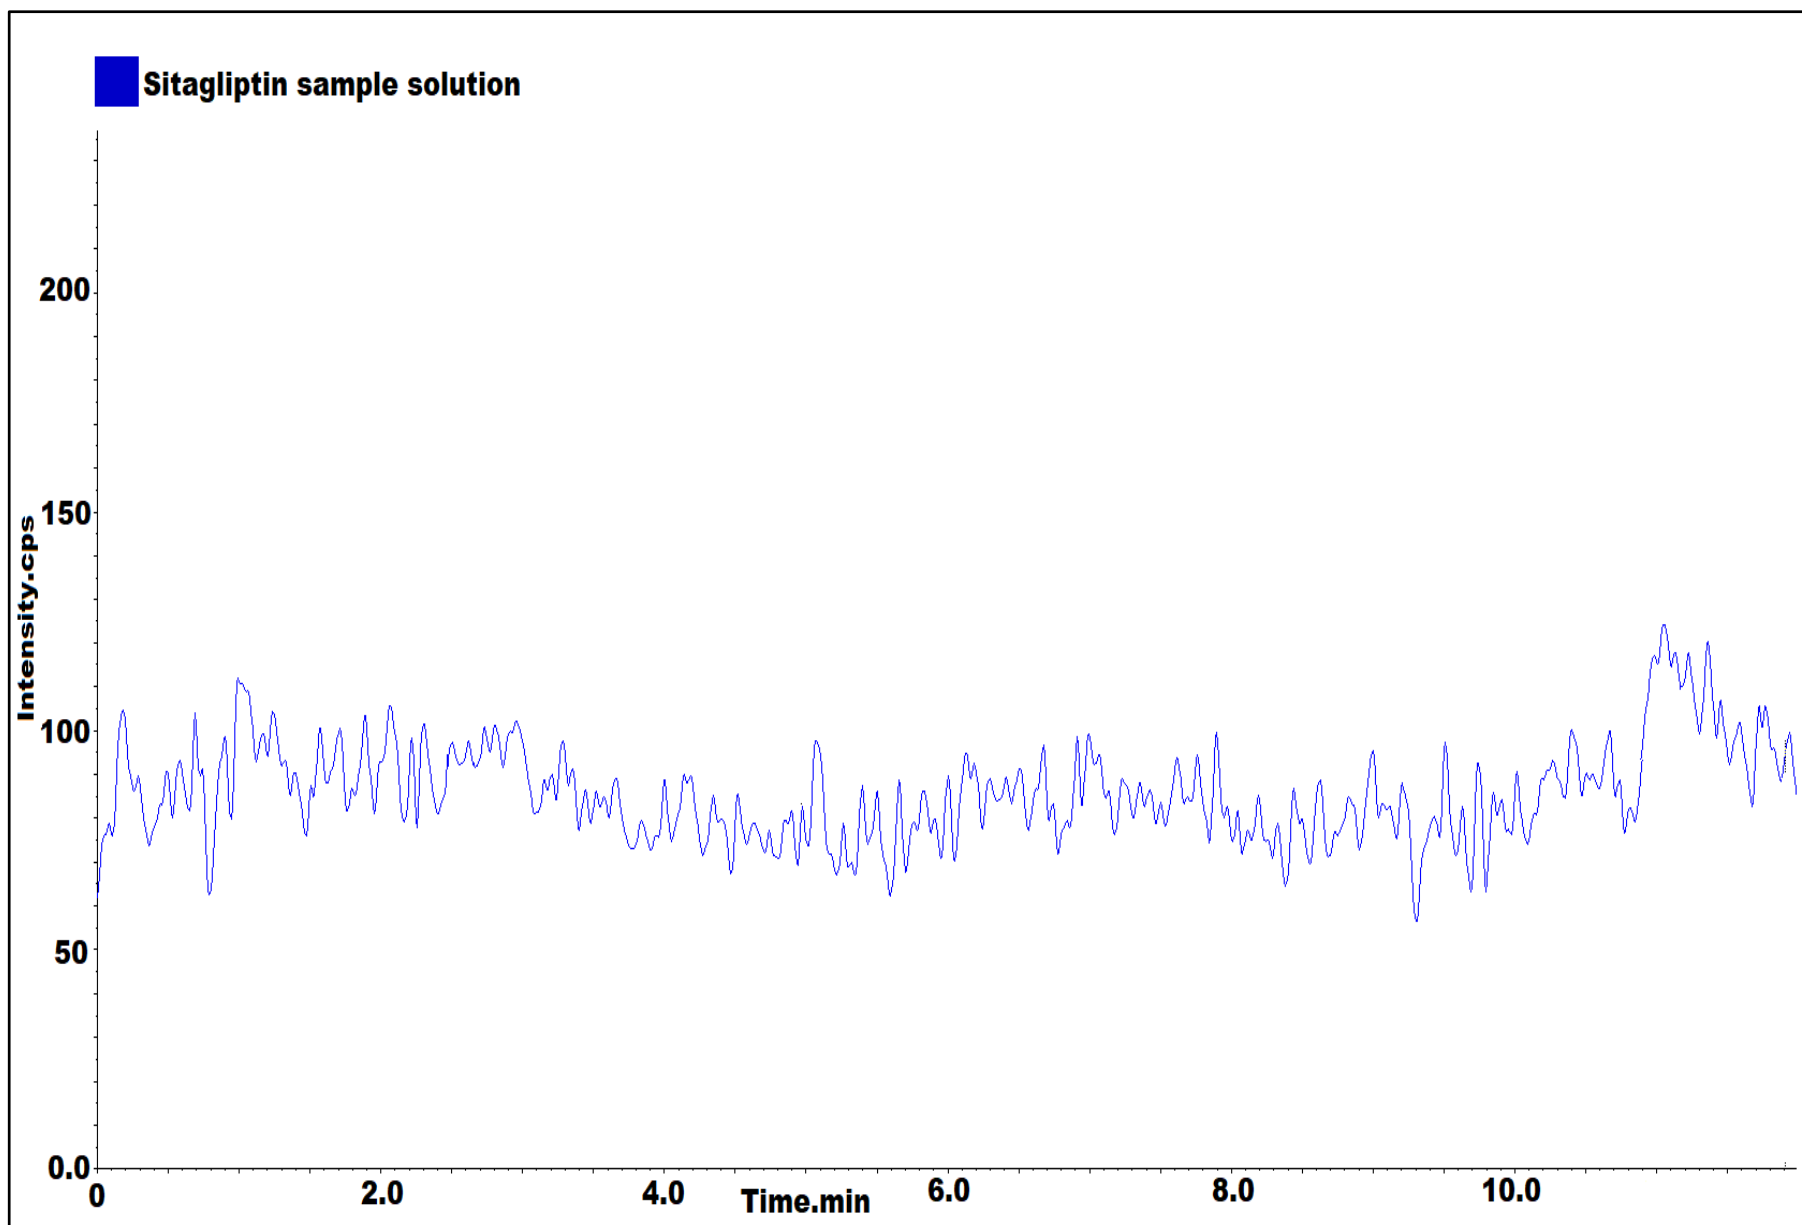

**Figure S4:** MS/MS chromatogram of Sitagliptin sample solution.

## 2. LOD, LOQ and LOQ precision

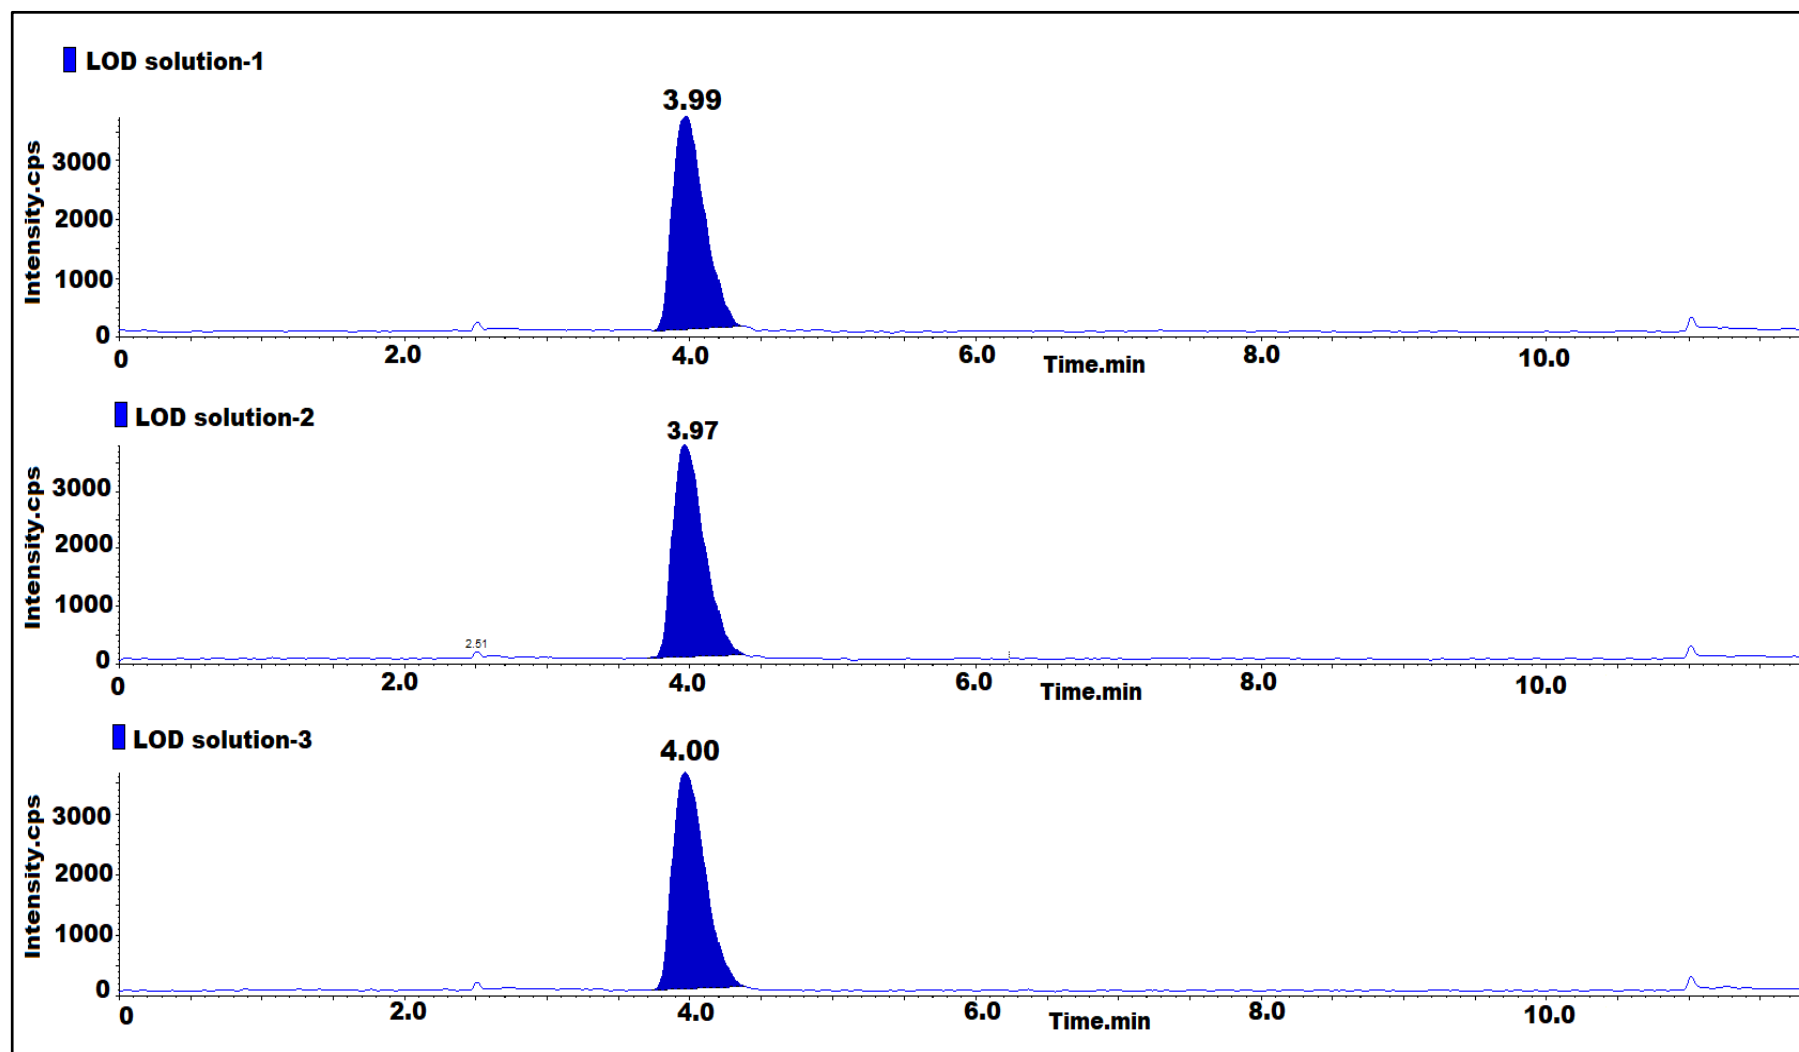

Figure S5: MS/MS chromatogram of LOD solution.

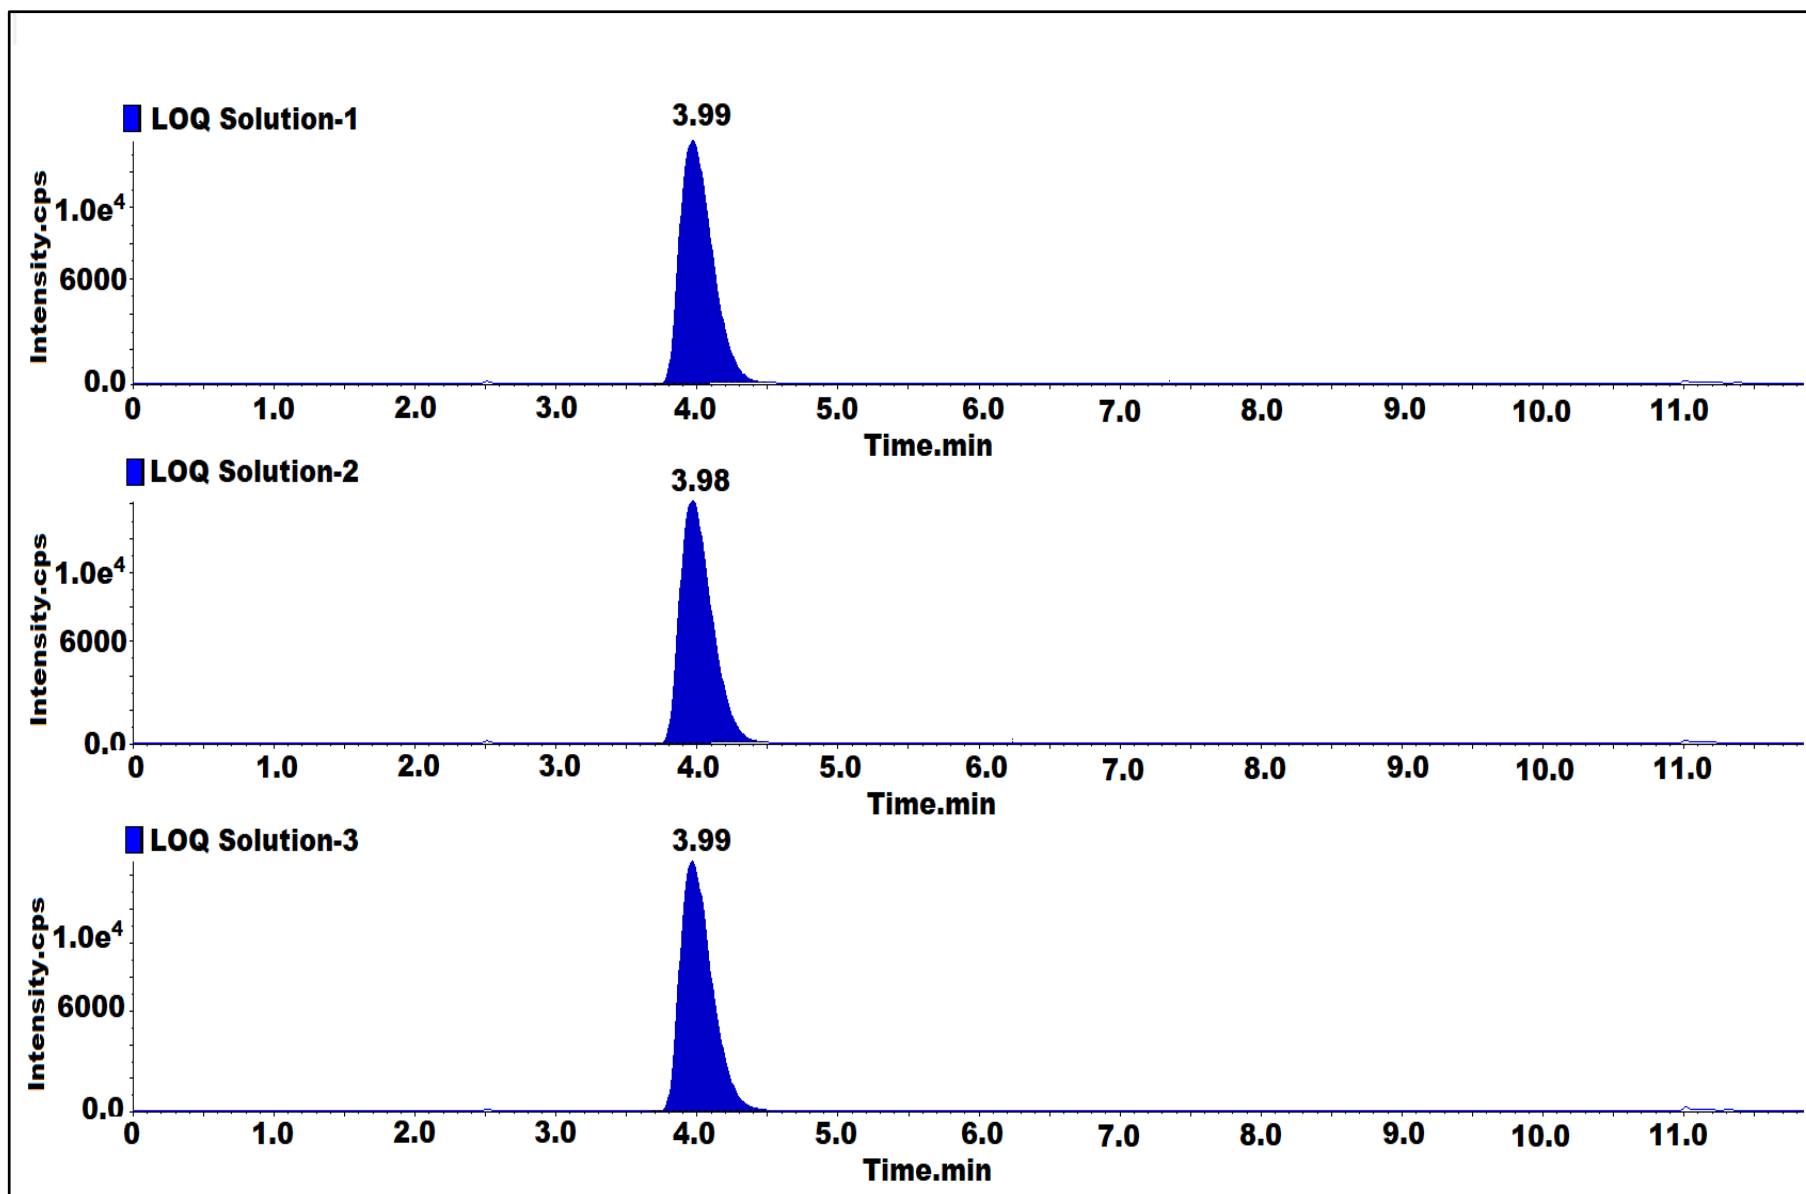

Figure S6: MS/MS chromatogram of LOQ solution.

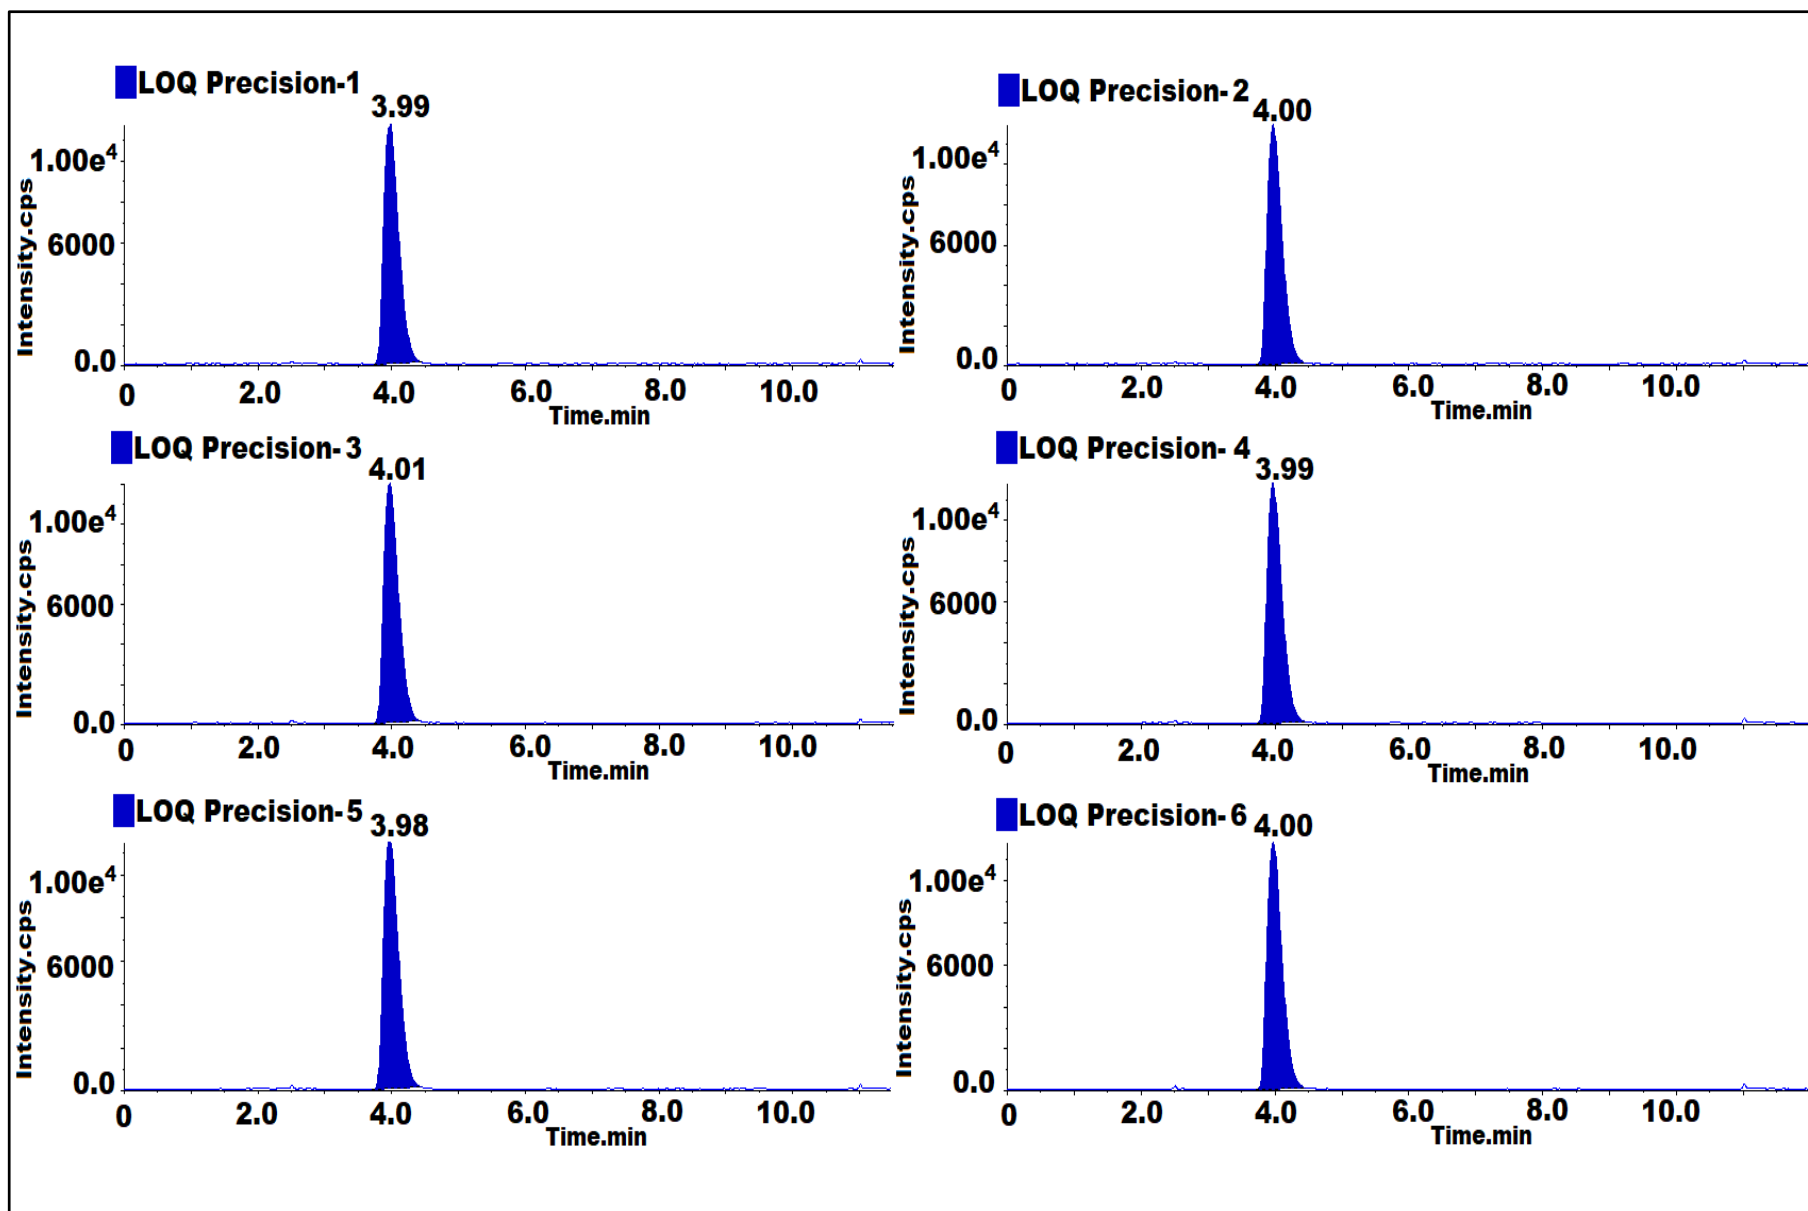

Figure S7: MS/MS chromatograms of LOQ Precision.



### 3. Linearity

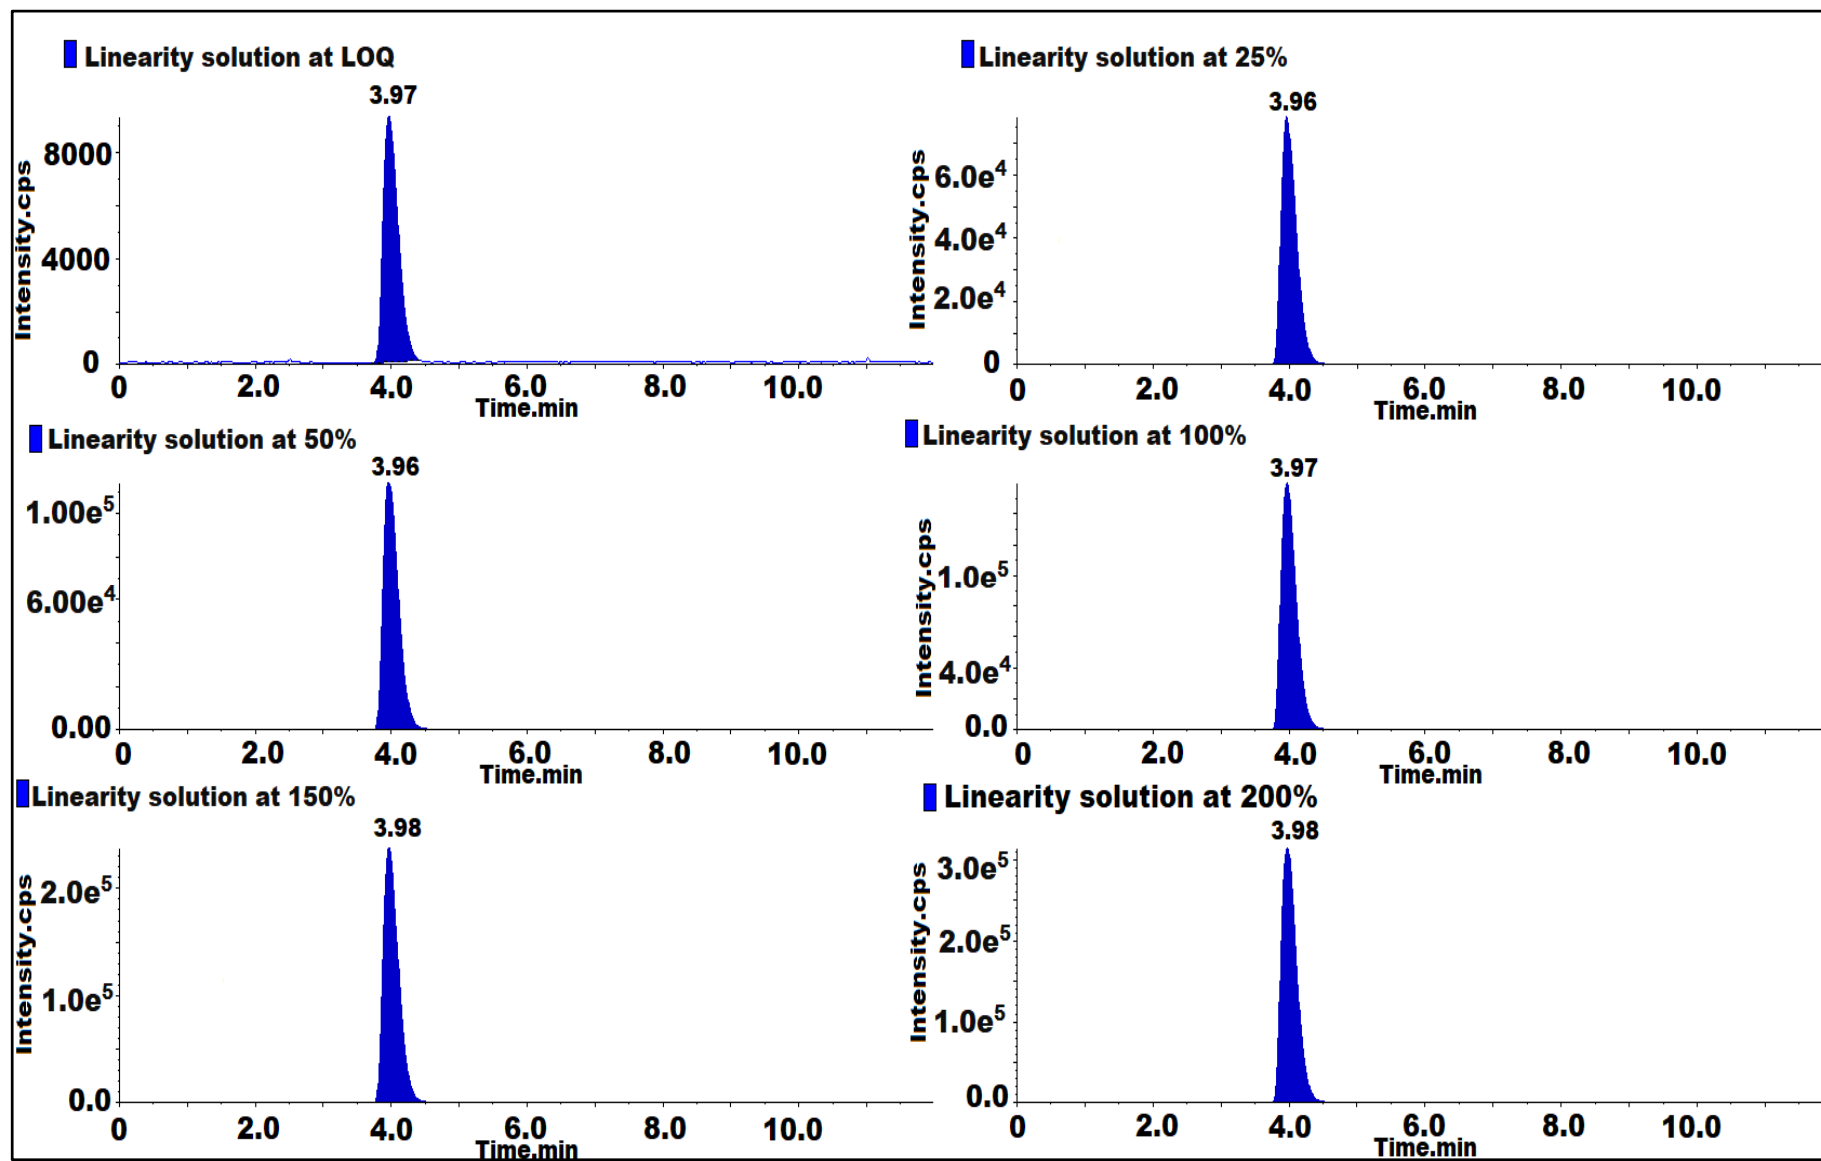

Figure S8: MS/MS chromatograms of Linearity solution.

#### 4. Method precision

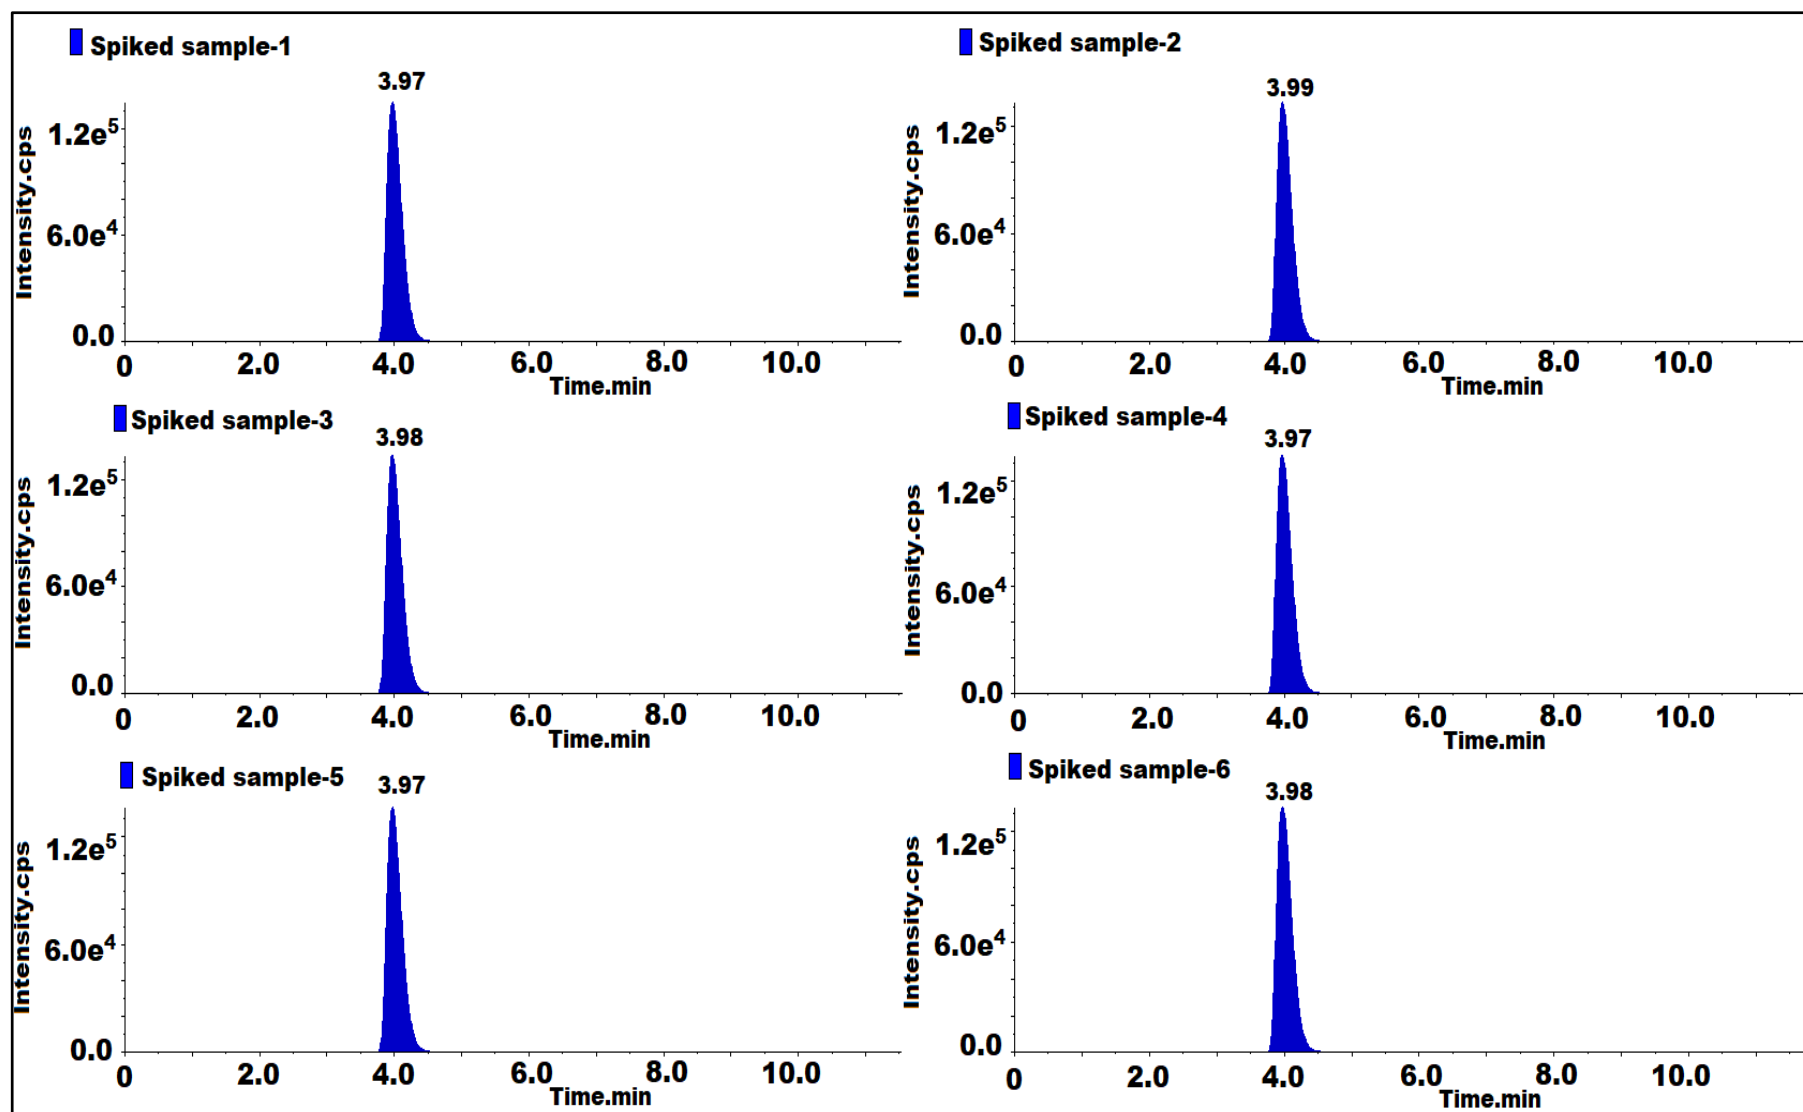

Figure S9: MS/MS chromatograms of Method precision.

## 5. Intermediate precision

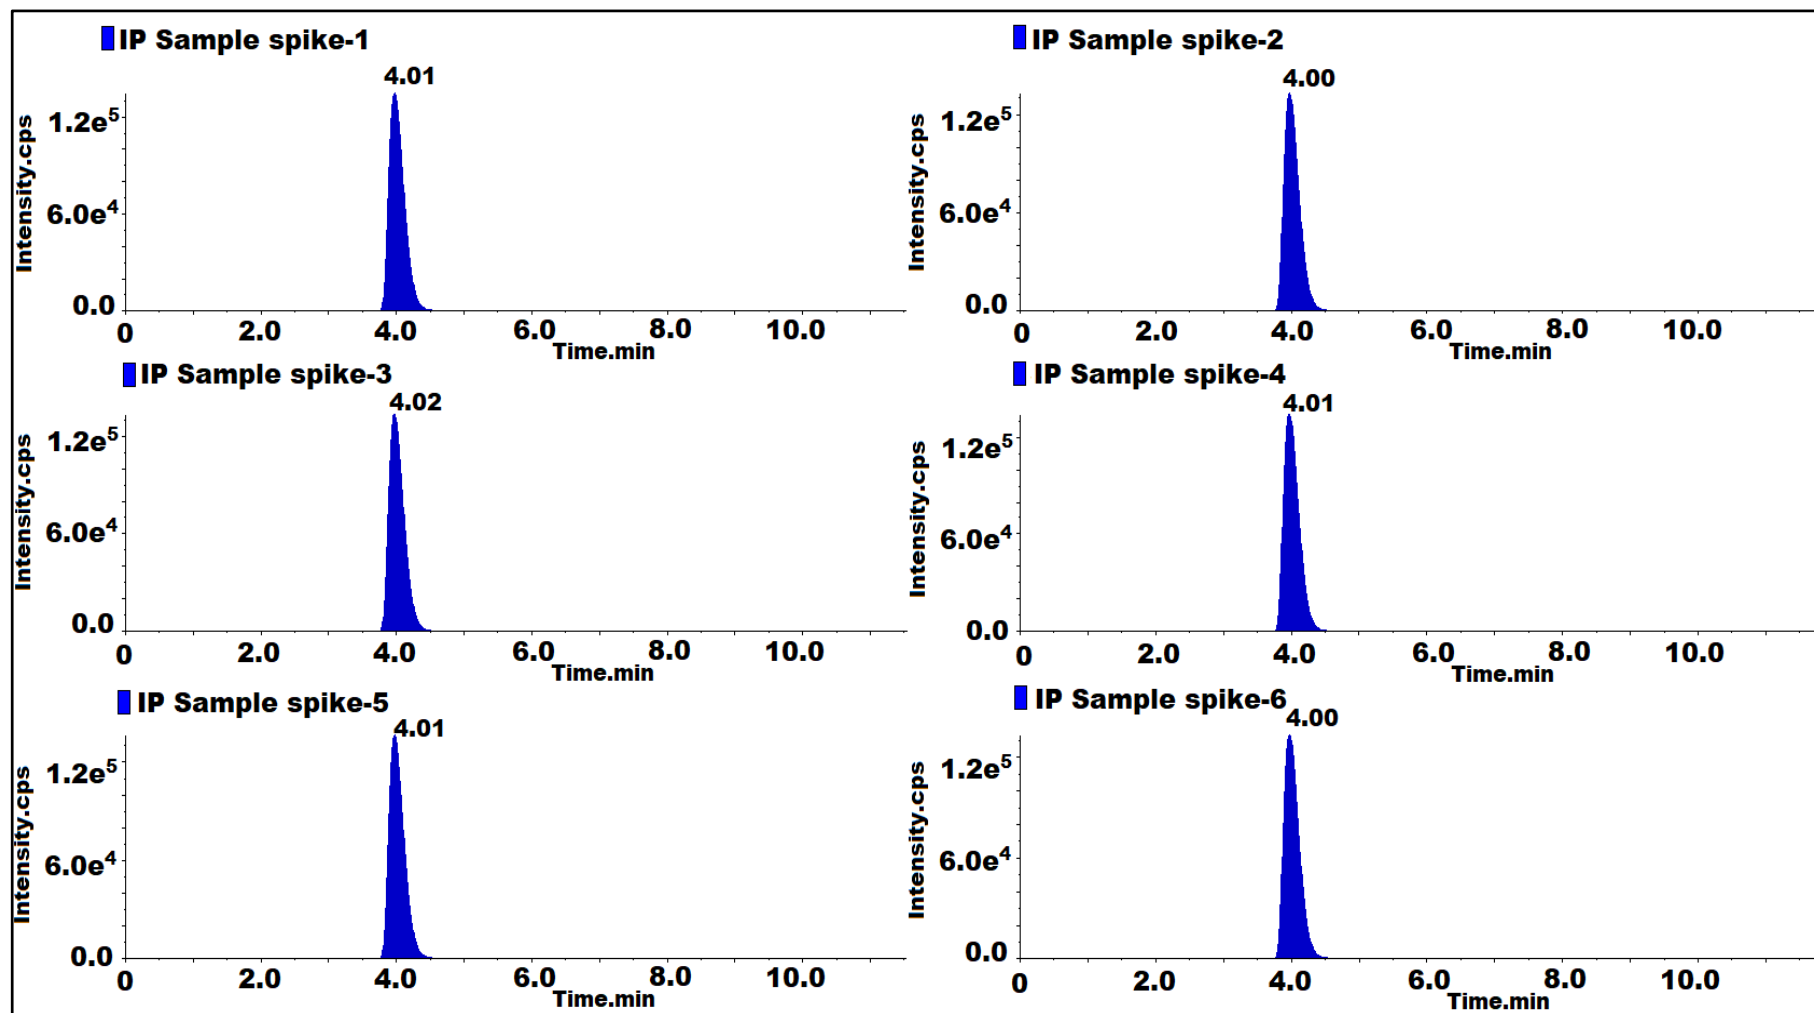

Figure S10: MS/MS chromatograms of Intermediate precision.

## 6. Accuracy

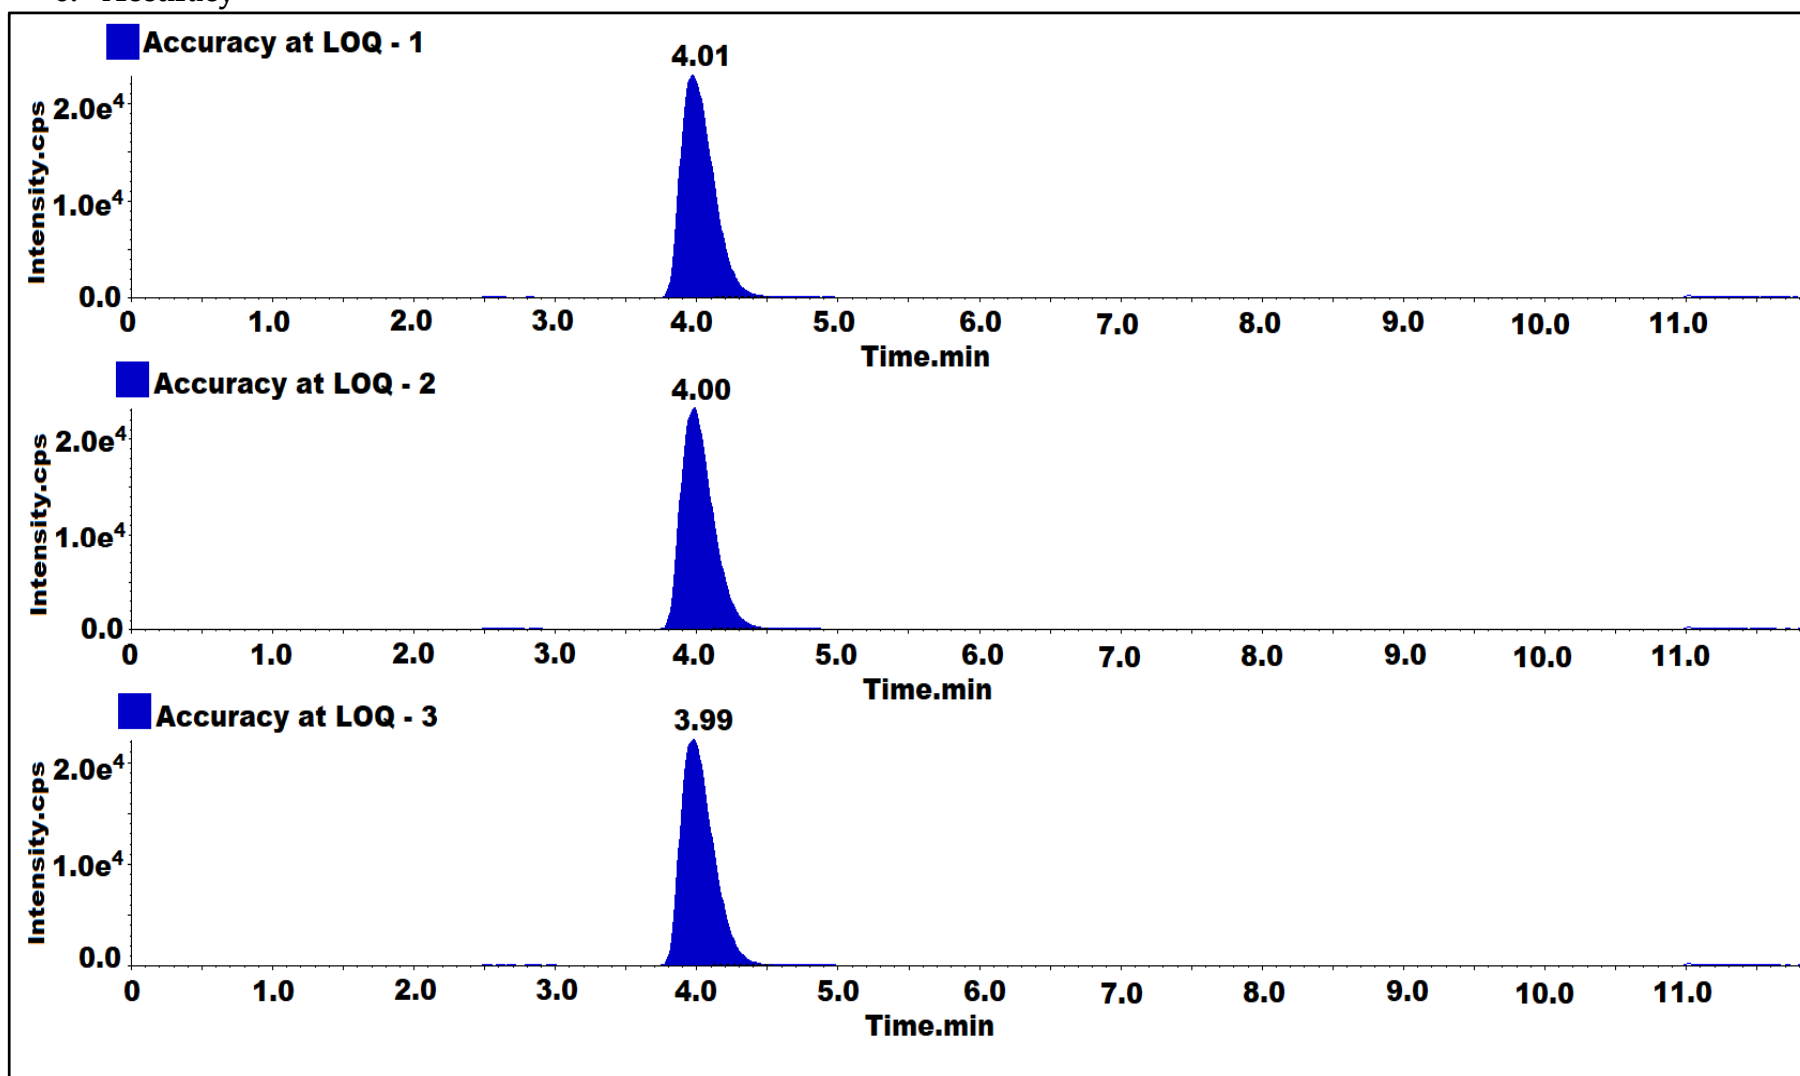

Figure S11: MS/MS chromatograms of LOQ Accuracy.

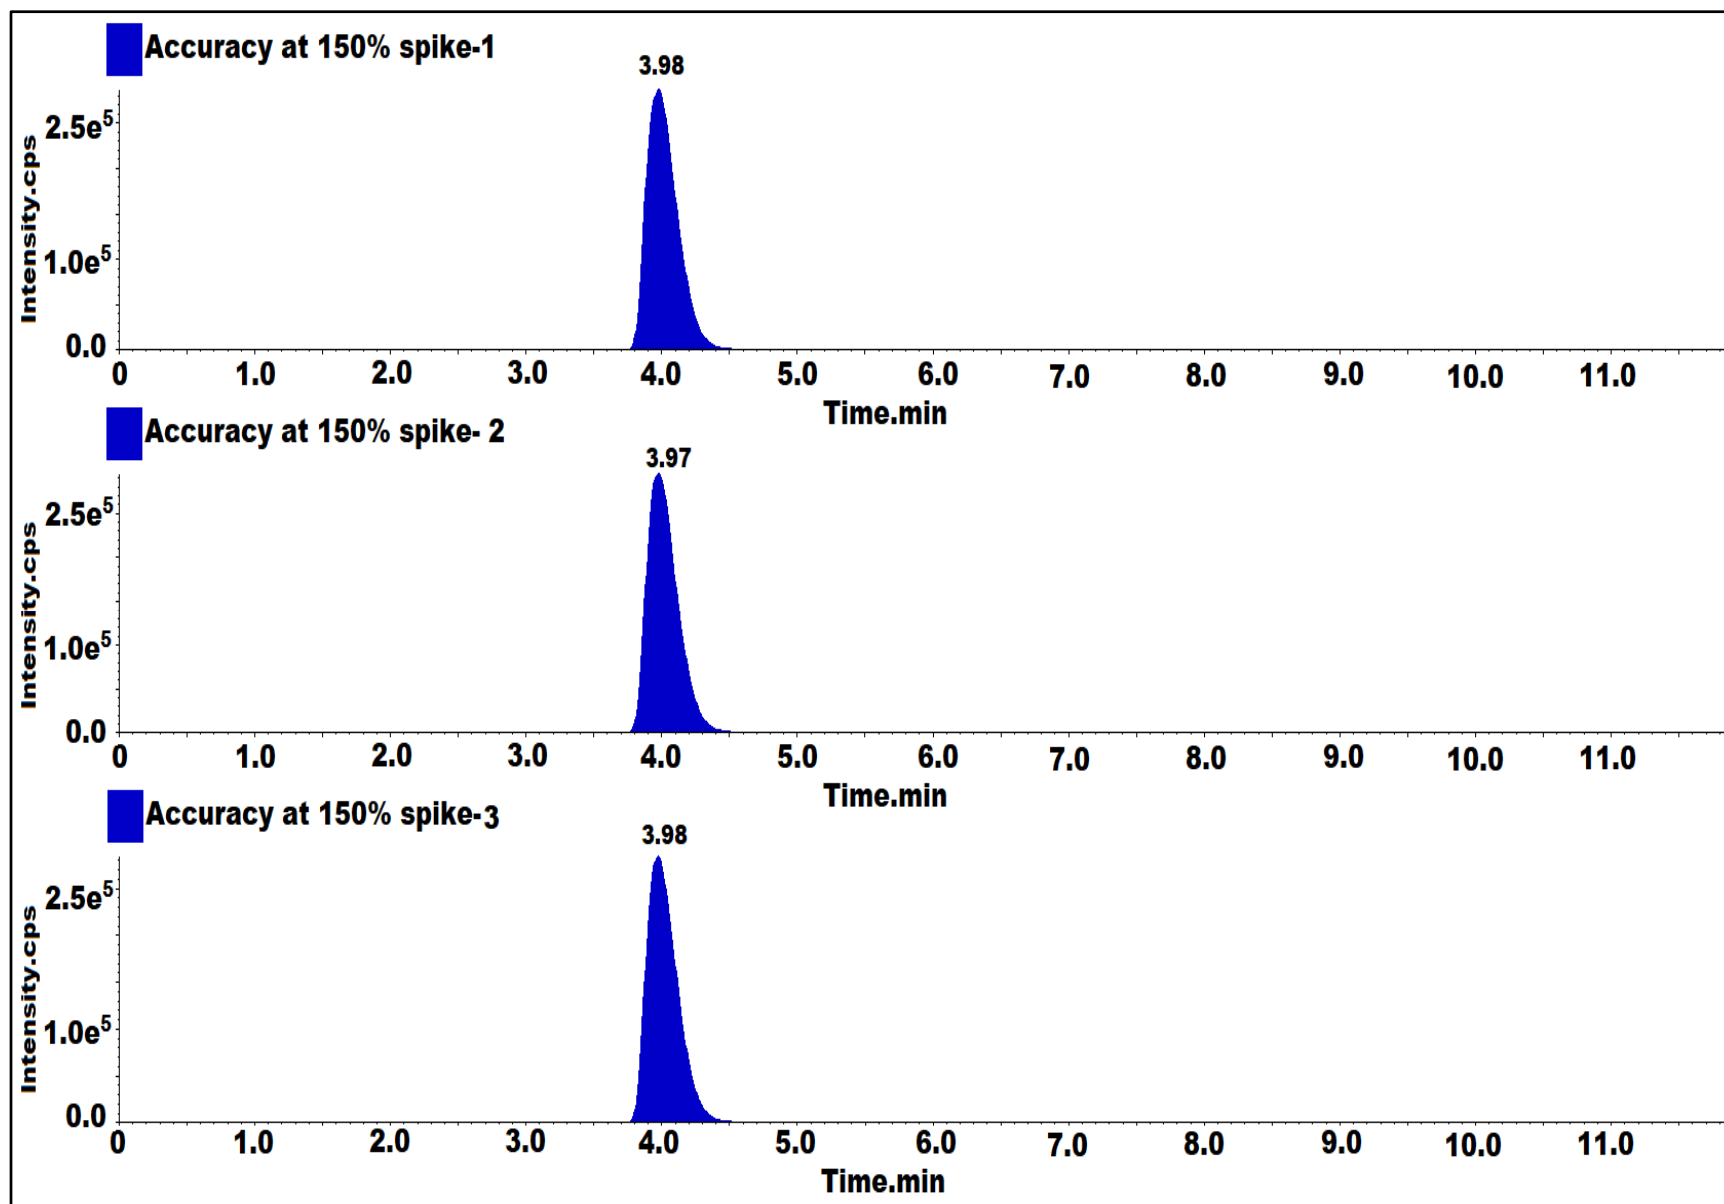

Figure S12: MS/MS chromatograms of LOQ Accuracy.

## 7. Solution stability

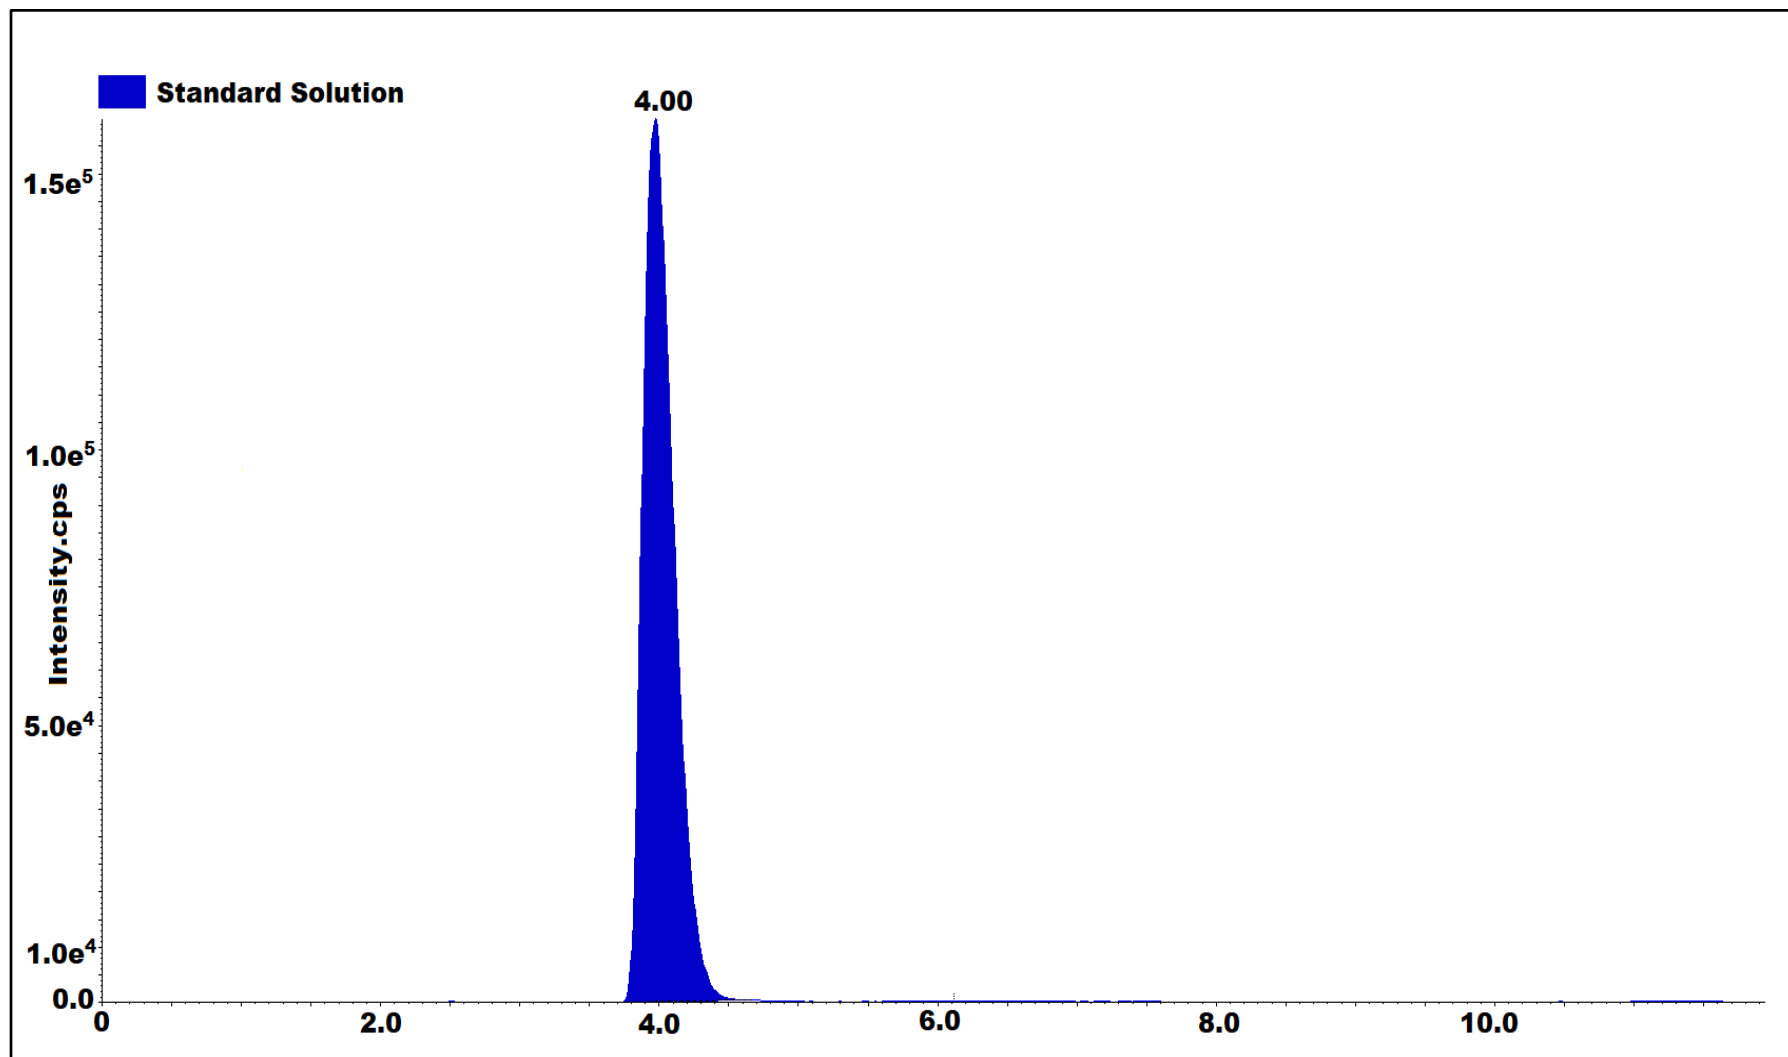

Figure S13: MS/MS chromatograms of Standard solution stability.

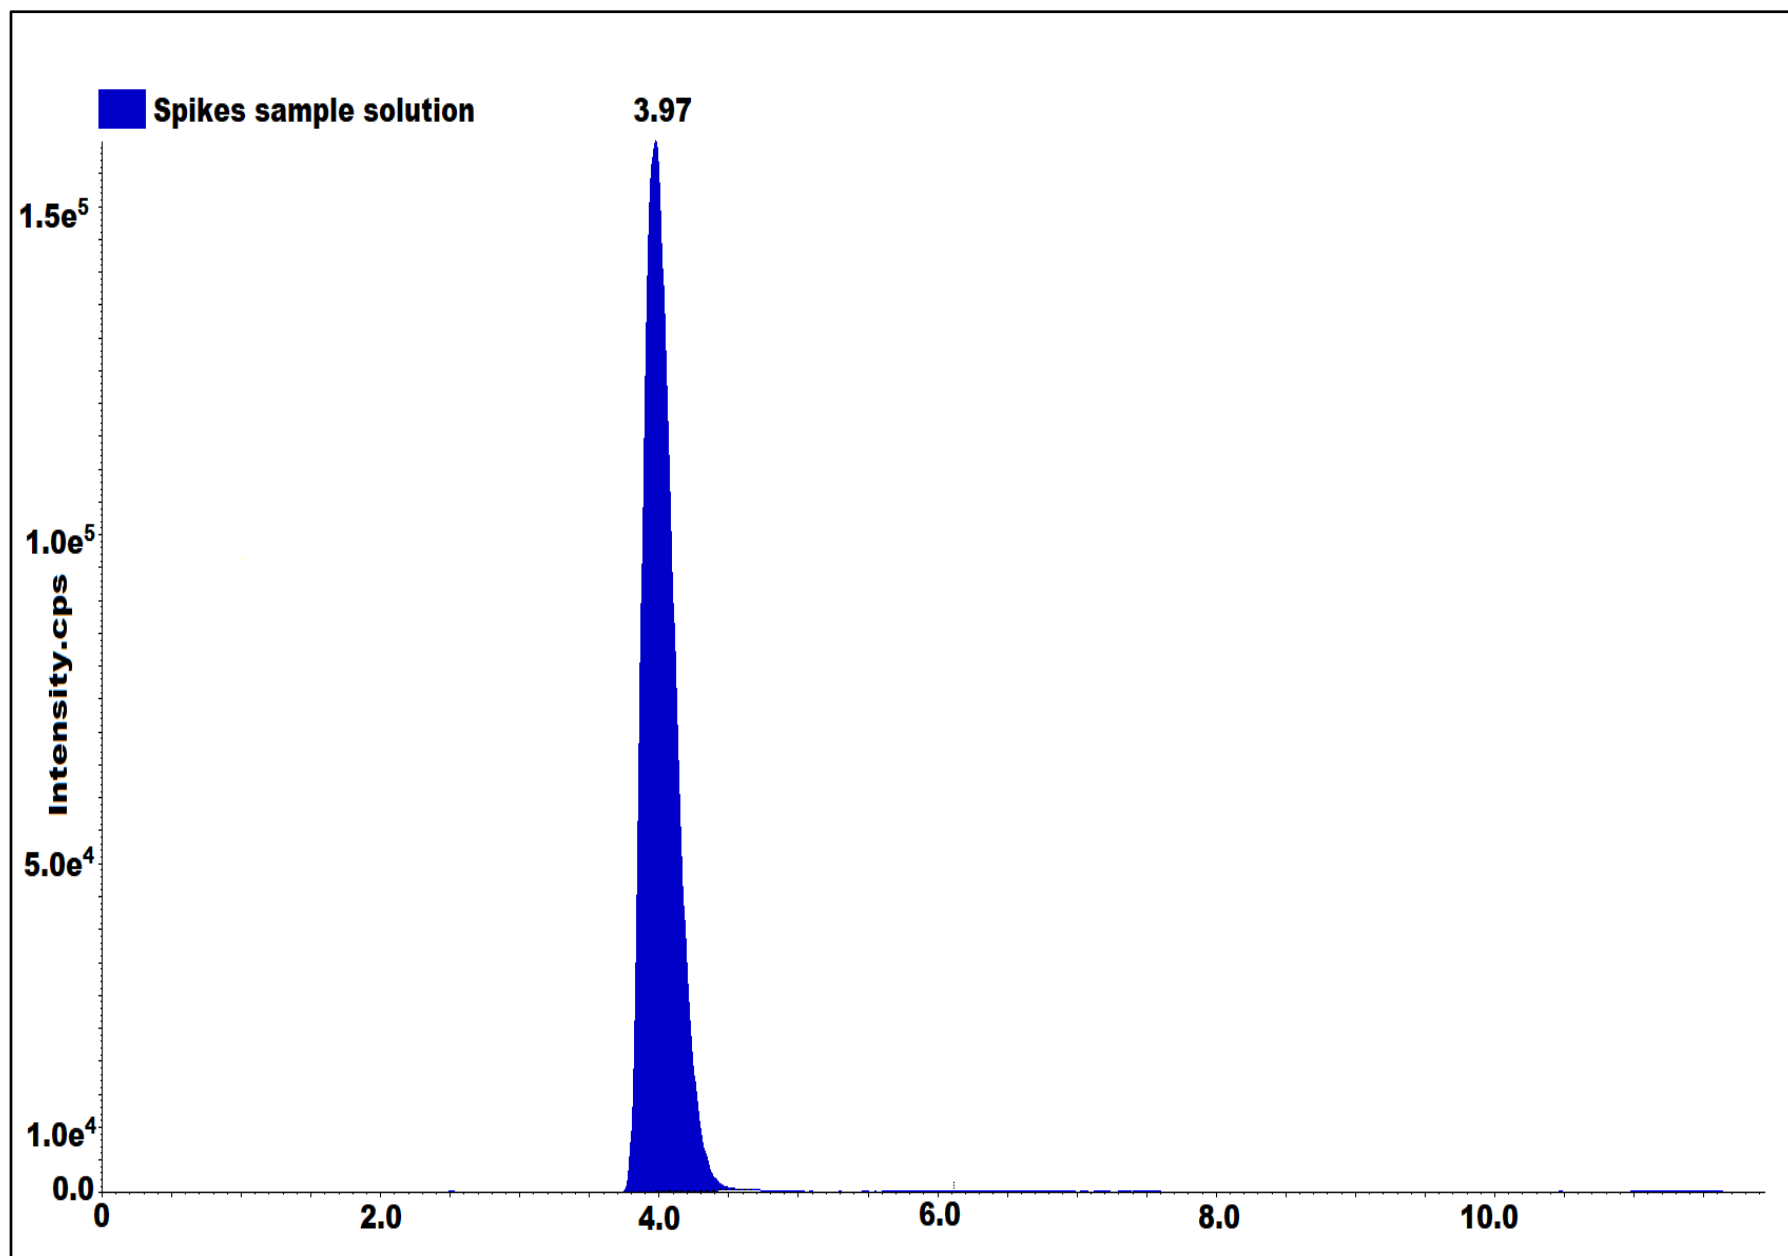

Figure S14: MS/MS chromatograms of Spiked sample solution stability.

8. Sitagliptin 7-nitroso impurity standard Qualification data

| CERTIFICATE OF ANALYSIS                                                                       |                                                                                 |                  |                   |
|-----------------------------------------------------------------------------------------------|---------------------------------------------------------------------------------|------------------|-------------------|
| Product Name                                                                                  | 7-nitroso-3-(trifluoromethyl)-5,6,7,8-tetrahydro-[1,2,4]triazolo[4,3-a]pyrazine |                  |                   |
| IUPAC Name                                                                                    | 7-Nitroso-3-(trifluoromethyl)-5,6,7,8-tetrahydro-[1,2,4]triazolo[4,3-a]pyrazine |                  |                   |
| Synonyms                                                                                      | Not available                                                                   |                  |                   |
| CAS #                                                                                         | Not available                                                                   |                  |                   |
| Molecular Formula                                                                             | C <sub>6</sub> H <sub>6</sub> F <sub>3</sub> N <sub>5</sub> O                   | Molecular weight | 221.14            |
| Longterm Storage Conditions                                                                   | Store at refrigerator (2-8°C) for long term storage                             |                  |                   |
| Shipping Conditions                                                                           | Product is stable to be shipped at room temperature                             |                  |                   |
| <div>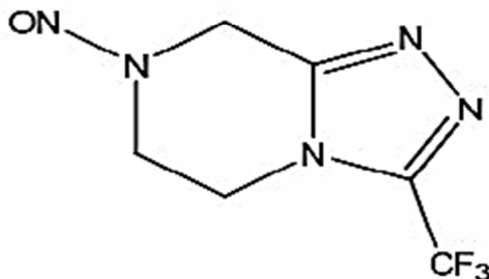</div> |                                                                                 |                  |                   |
| Test                                                                                          | Specification                                                                   |                  | Result            |
| Appearance                                                                                    | Light Green Solid                                                               |                  | Light Green Solid |
| Solubility                                                                                    | Soluble in DMSO                                                                 |                  | In DMSO           |
| <sup>1</sup> H NMR spectrum                                                                   | Conform structure                                                               |                  | Confirms          |
| Mass Spectrum                                                                                 | Conform molecular weight                                                        |                  | Confirms          |
| Purity by HPLC - c                                                                            | Not less than 90%                                                               |                  | 99.51%            |
| Volatiles content % (by TGA) - b                                                              | Not specified                                                                   |                  | 0.50% (w/w)       |
| Ash content % (by TGA) - a                                                                    | Not specified                                                                   |                  | 1.39% (w/w)       |
| Potency based on Mass balance $\{[100 - (b+a)] \times (c/100)\}$                              | Not specified                                                                   |                  | 97.63%            |

Figure S15: 7-nitroso impurity Certificate of analysis.



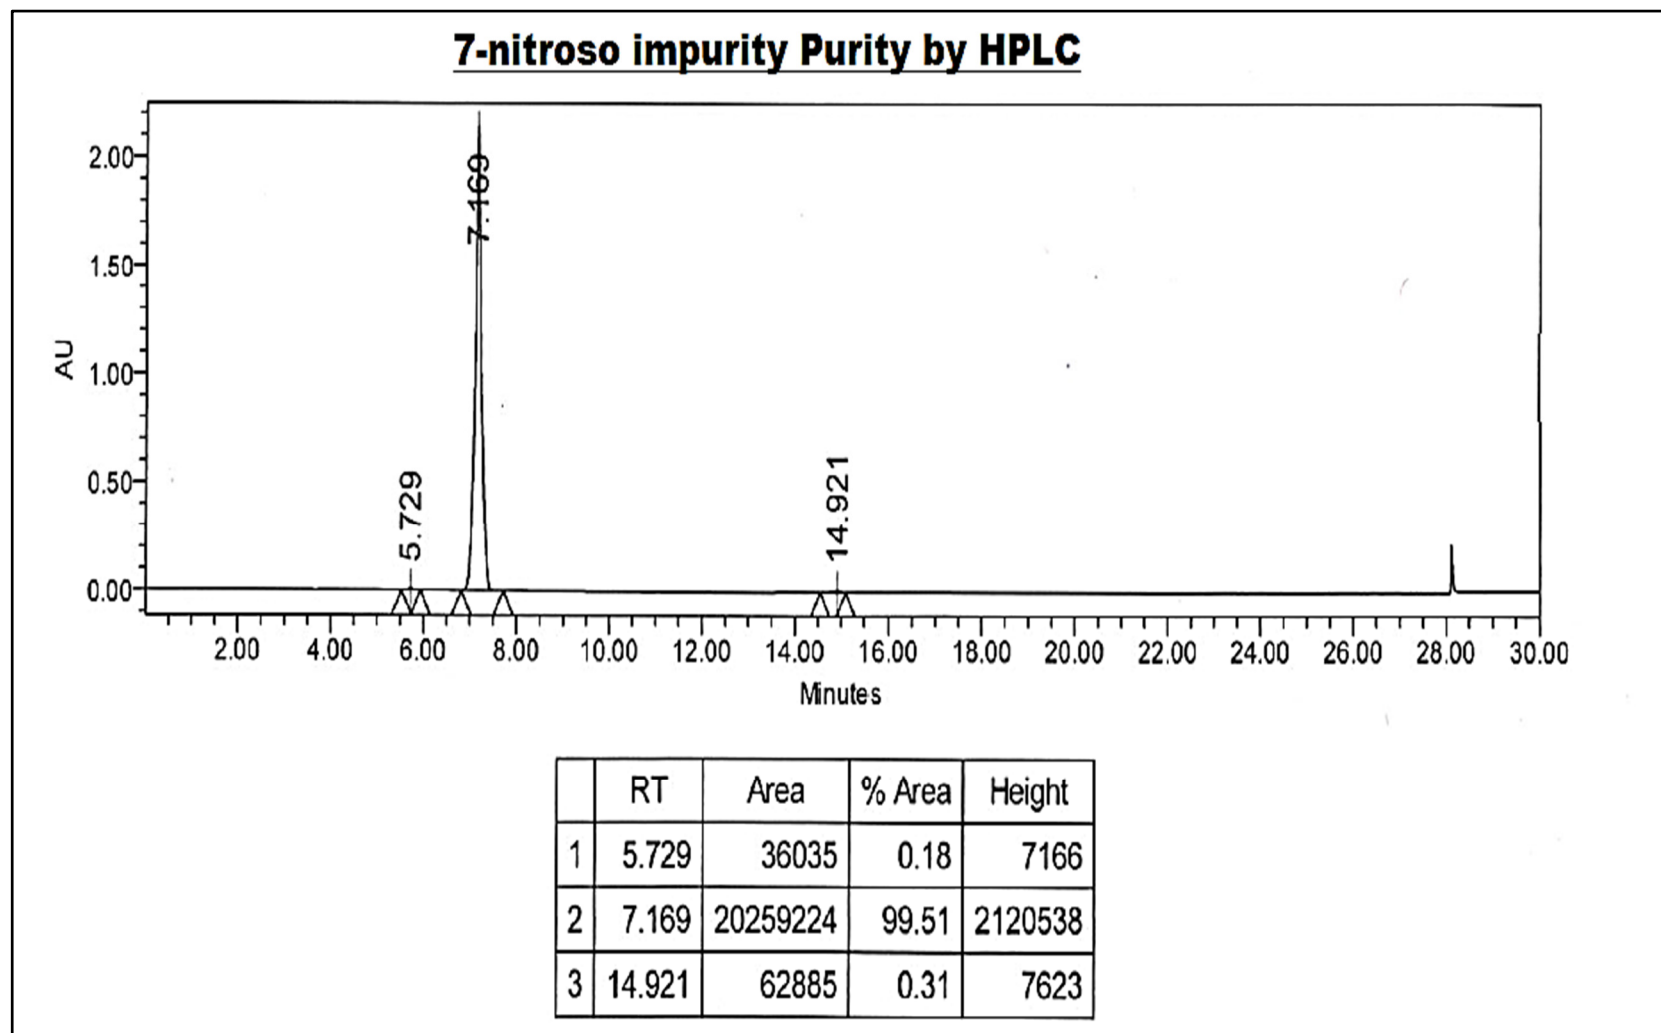

**Figure S16:** 7-nitroso impurity purity by HPLC chromatogram.

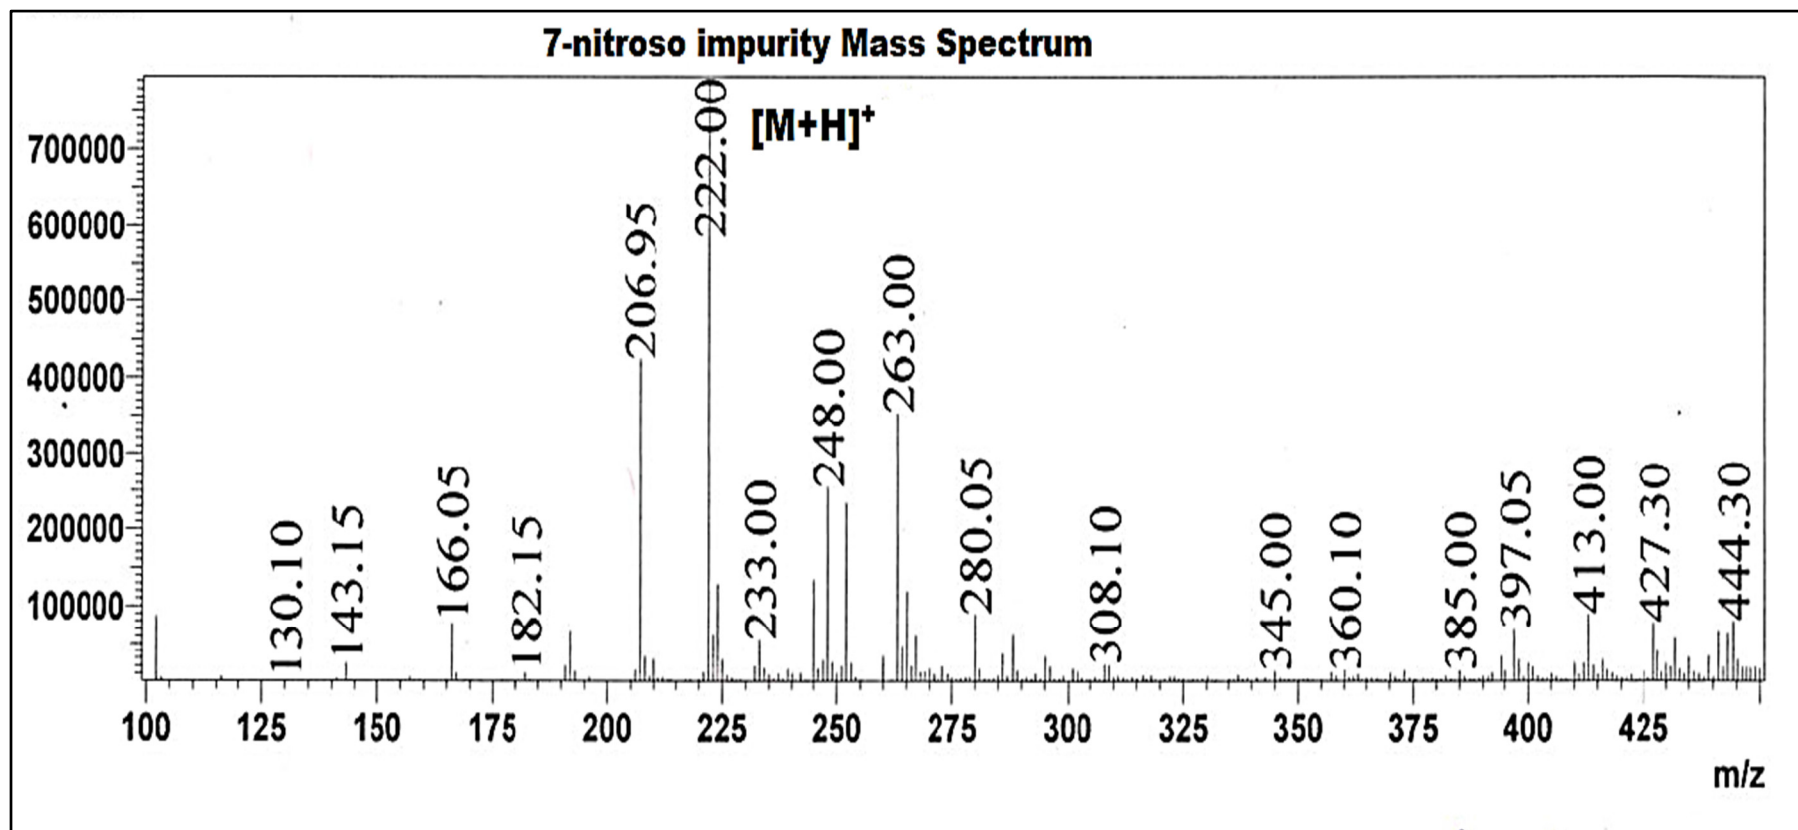

Figure S17: 7-nitroso impurity Mass spectrum.

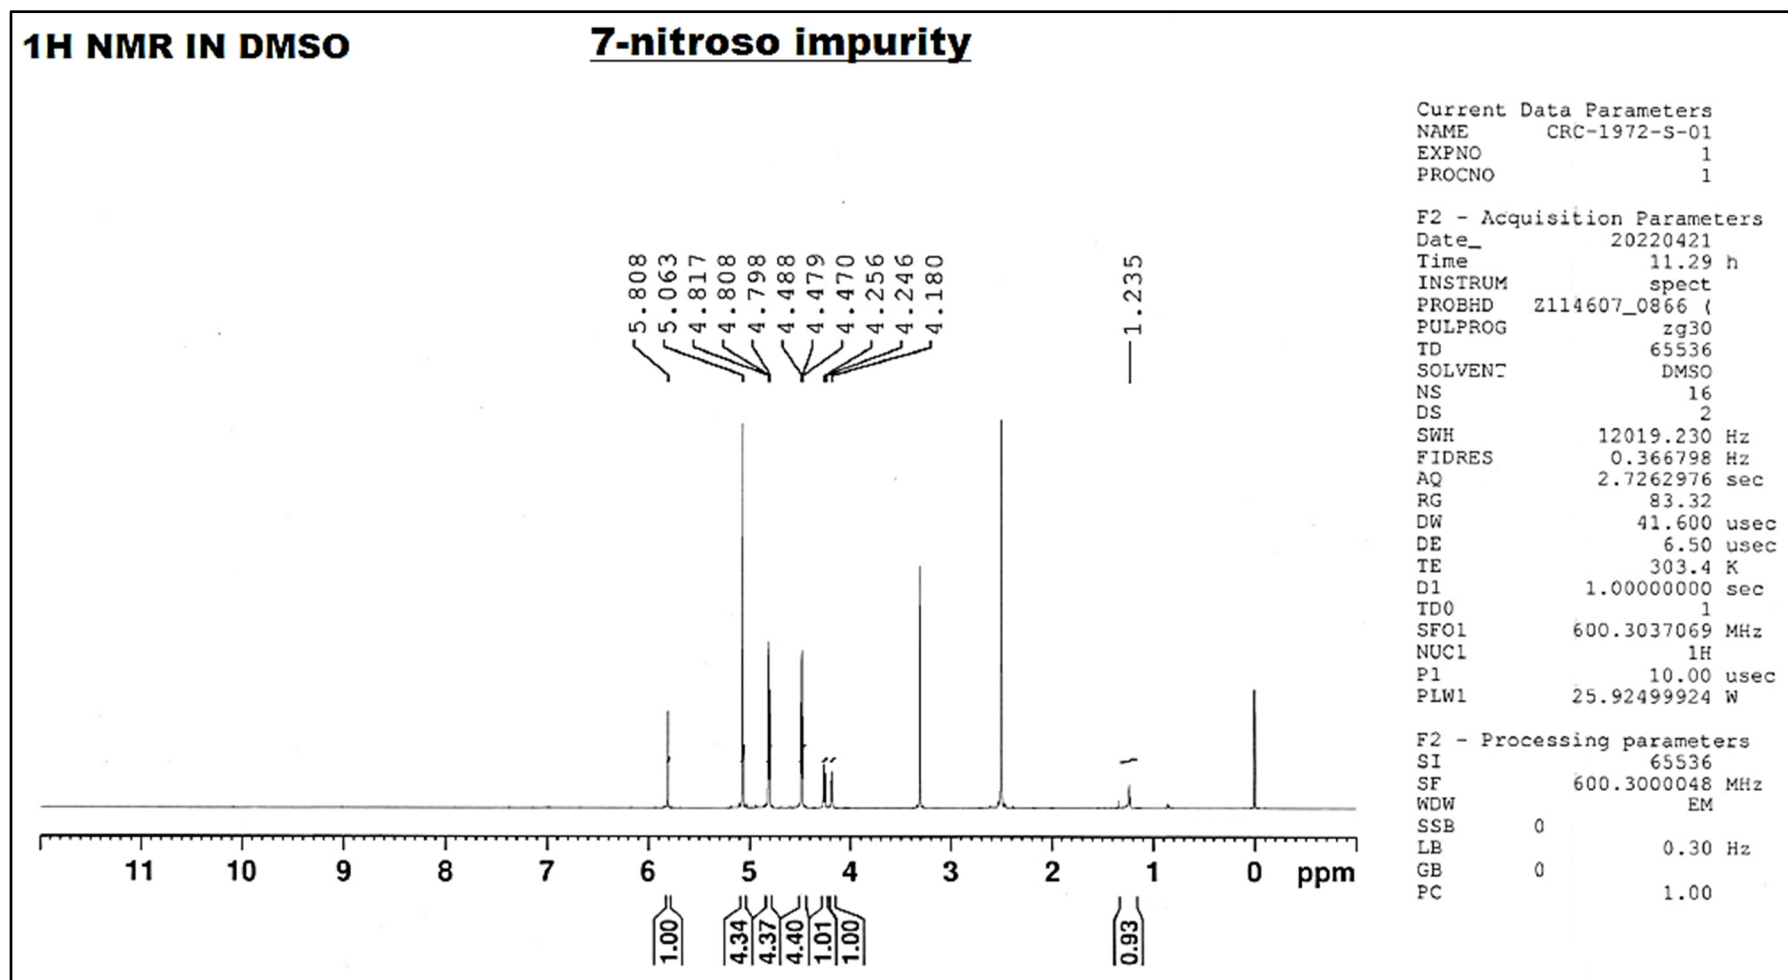

Figure S18: 7-nitroso impurity 1H NMR spectrum – 1.

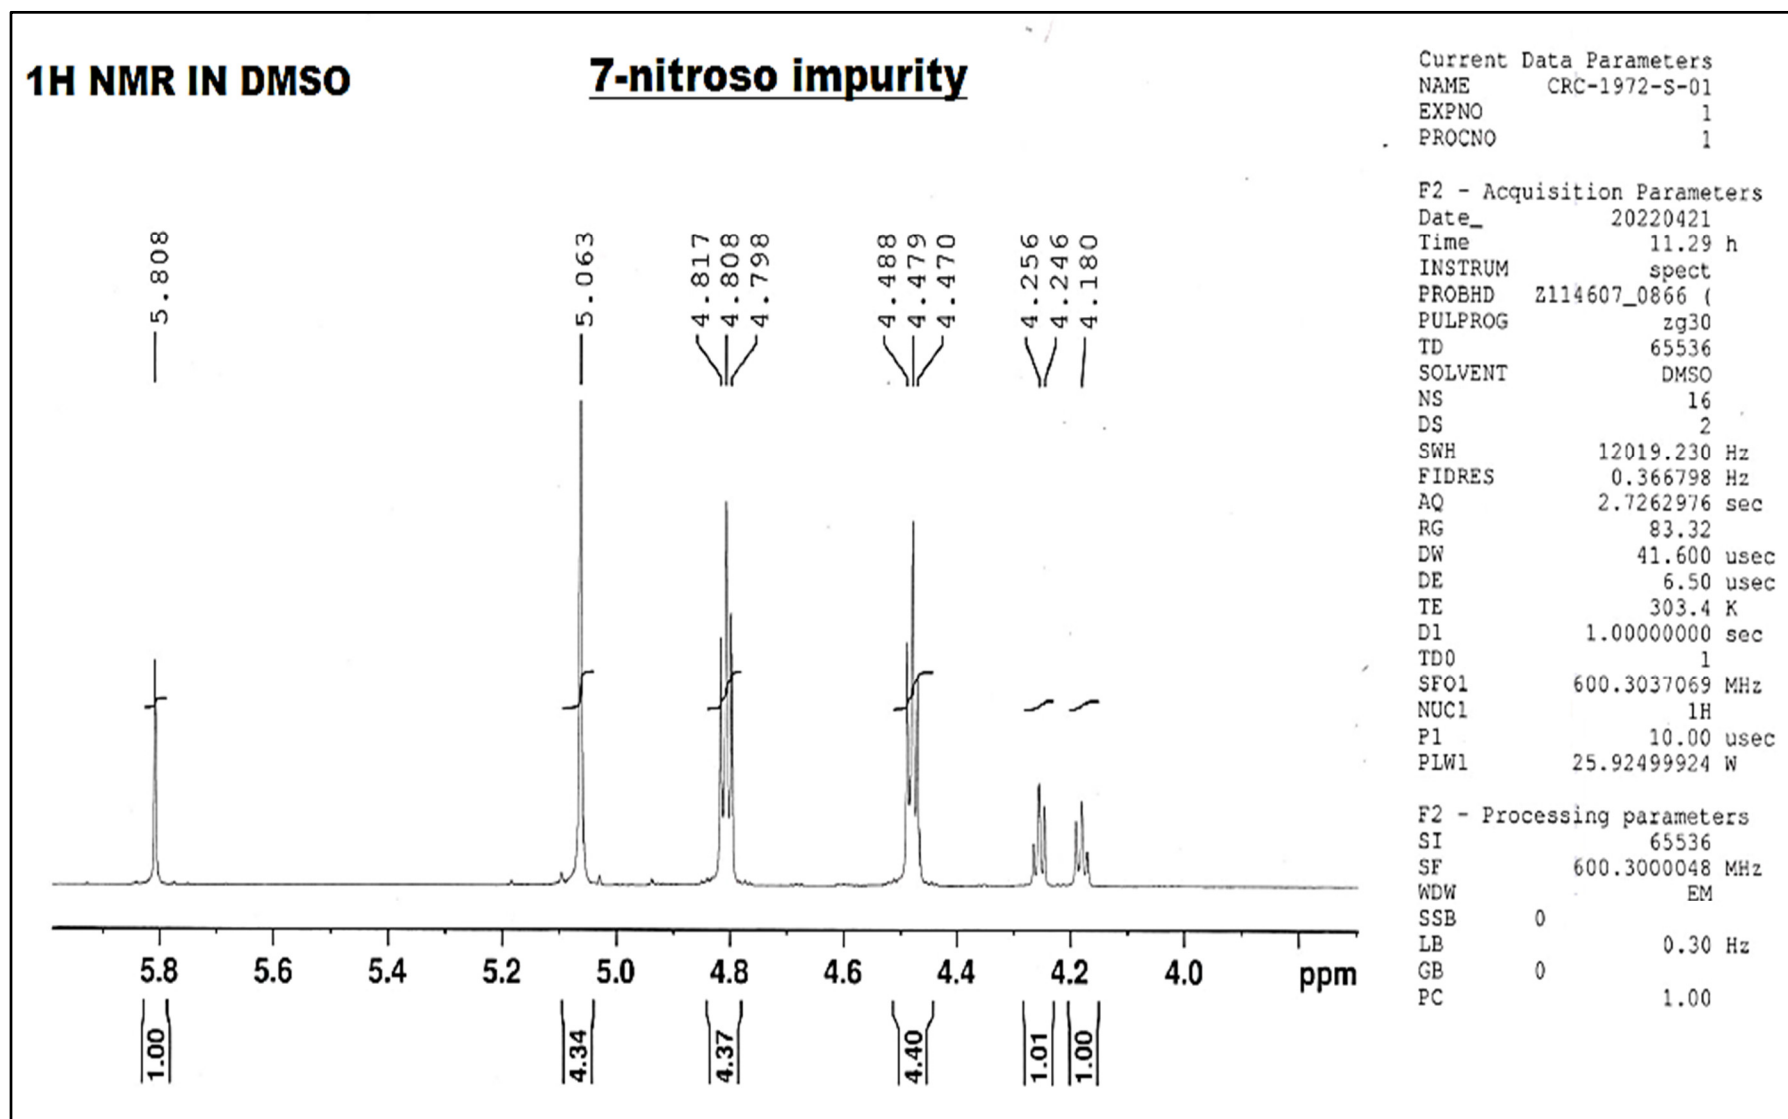

Figure S19: 7-nitroso impurity 1H NMR spectrum – 2.

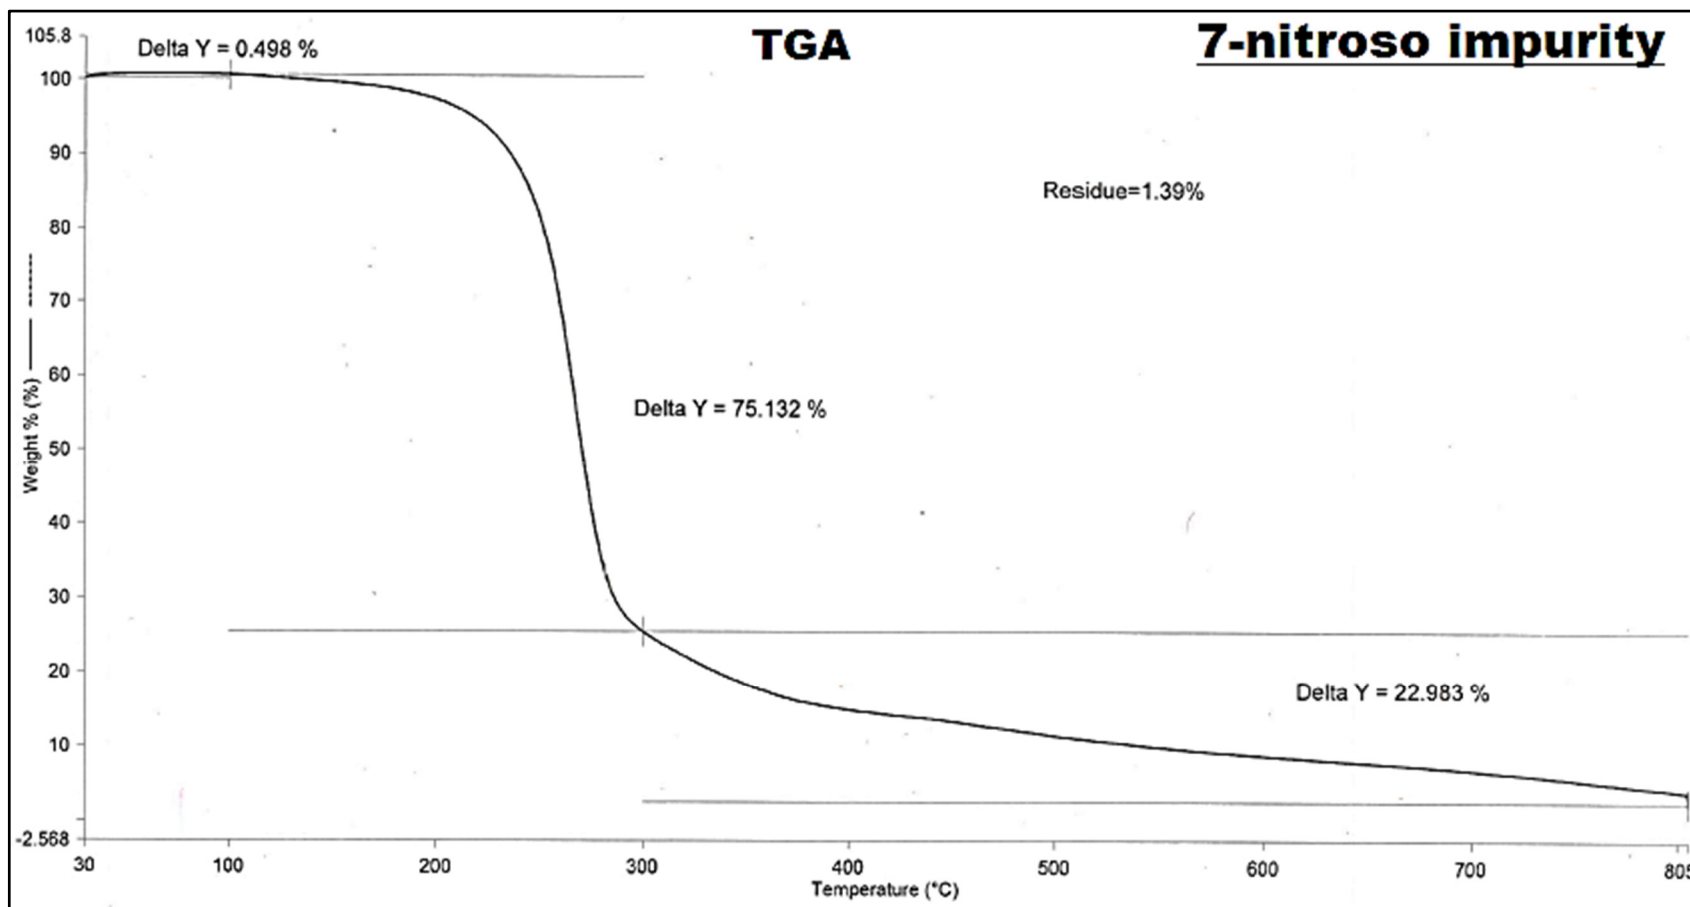

Figure S20: 7-nitroso impurity TGA graph.

**7-nitroso-3-(trifluoromethyl)-5,6,7,8-tetrahydro-[1,2,4] triazolo[4,3-a] pyrazine probable parsing pyrolysis fragmentation.**

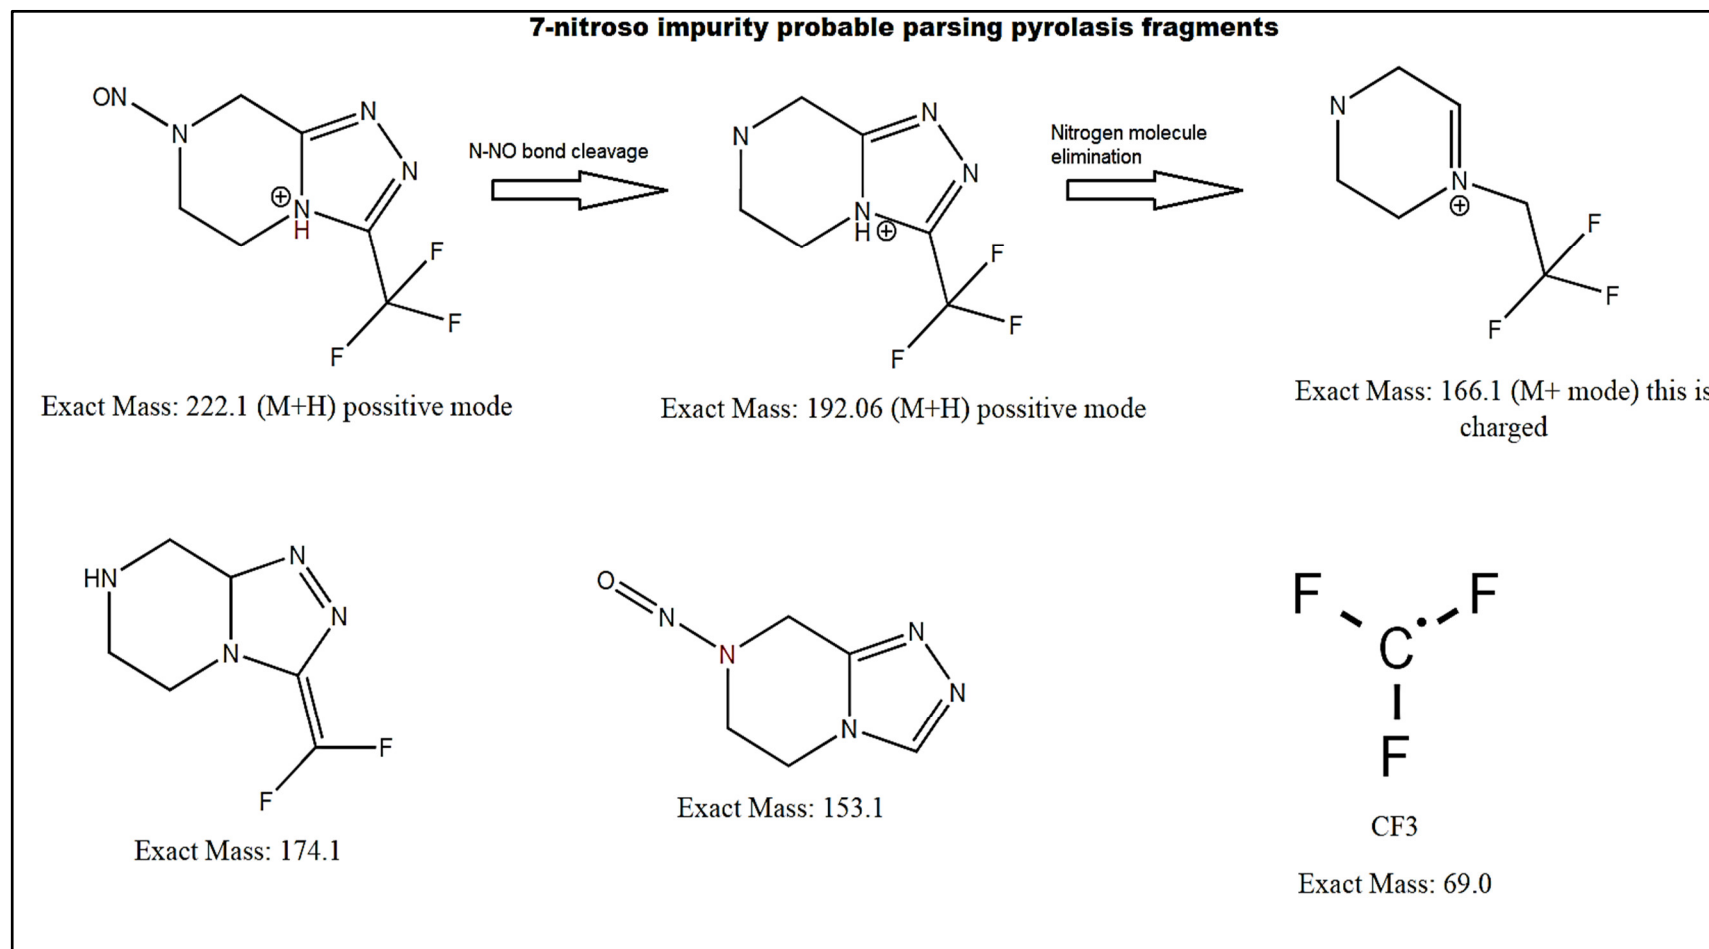

**Figure S21:** Probable Fragmentation pattern of 7-nitroso impurity in the mass ionization chamber due to parsing pyrolysis.
